# Supplementary material for: Adipose tissue dysfunction as a central mechanism leading to dysmetabolic obesity triggered by chronic exposure to p,p’-DDE
Source: PubMed Central journal article supplement (PMC5453948; doi:10.1038/s41598-017-02885-9), 2017-06-01
Supplement: 41598_2017_2885_MOESM1_ESM.pdf [file 41598_2017_2885_MOESM1_ESM.pdf]

## Supplementary Information

### Adipose tissue dysfunction as a central mechanism leading to dysmetabolic obesity triggered by chronic exposure to *p,p'*-DDE

Diogo Pestana, Diana Teixeira, Manuela Meireles, Cláudia Marques, Sónia Norberto,  
Carla Sá, Virgínia C Fernandes, Luísa Correia-Sá, Ana Faria, Luísa Guardão, João T  
Guimarães, Wendy N Cooper, Ionel Sandovici, Valentina F Domingues, Cristina  
Delerue-Matos, Rosário Monteiro, Miguel Constância and Conceição Calhau

#### Table of Contents:

|                                                                                                                                                                                                                                  |        |
|----------------------------------------------------------------------------------------------------------------------------------------------------------------------------------------------------------------------------------|--------|
| Figure S1. Top transcription factors associated with HF/DDE sensitive genes.....                                                                                                                                                 | Pg. 2  |
| Figure S2. Methylation profile of <i>Dpp4</i> , <i>Mst4</i> , <i>Isl1</i> , <i>Gata5</i> , <i>Snap25</i> , <i>Uchl1</i> , <i>Crabp1</i> and <i>Npy</i><br>promoter regions in mesenteric vAT measured by Sequenom MassARRAY..... | Pg. 3  |
| Figure S3. Validation of microarrays.....                                                                                                                                                                                        | Pg. 4  |
| Table S1. Plasma and urine biochemical parameters .....                                                                                                                                                                          | Pg. 5  |
| Table S2. Genes up- and down-regulated (expression microarray analysis).....                                                                                                                                                     | Pg. 6  |
| Table S3. Primers for gene expression analysis by quantitative real-time PCR.....                                                                                                                                                | Pg. 21 |
| Table S4. Summarized parameters of Sequenom primer pairs.....                                                                                                                                                                    | Pg. 21 |
| Supplementary methods.....                                                                                                                                                                                                       | Pg. 22 |

**Figure S1.** Top transcription factors associated with HF/DDE sensitive genes. (A) Representative data network between transcription factors and modulated genes using IPA. Relative expression is depicted by green and red colouring to denote down- and up-regulation compared to HF animals, respectively.

| Regulator     | Regulation z-score | p value                | Prediction activation state |
|---------------|--------------------|------------------------|-----------------------------|
| <b>Up</b>     |                    |                        |                             |
| <i>HNF4A</i>  | 2.427              | $9.70 \times 10^{-2}$  | <b>activated</b>            |
| <i>STAT3</i>  | 1.852              | $4.77 \times 10^{-1}$  |                             |
| <i>REST</i>   | 1.815              | $2.84 \times 10^{-11}$ |                             |
| <i>ZNF217</i> | 1.382              | $1.23 \times 10^{-2}$  |                             |
| <i>HTT</i>    | 0.950              | $8.48 \times 10^{-6}$  |                             |
| <b>Down</b>   |                    |                        |                             |
| <i>ESR1</i>   | -1.730             | $3.58 \times 10^{-1}$  |                             |
| <i>PAX7</i>   | -1.181             | $4.07 \times 10^{-2}$  |                             |
| <i>POU4F1</i> | -0.988             | $2.23 \times 10^{-7}$  |                             |
| <i>ISL1</i>   | -0.271             | $4.22 \times 10^{-5}$  |                             |

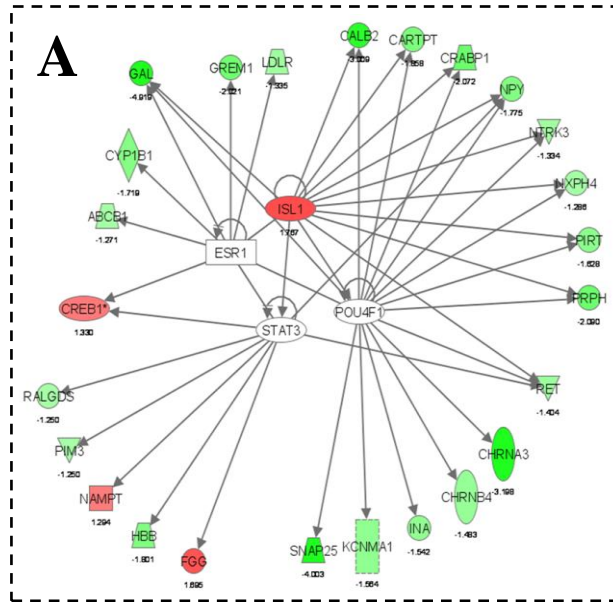

**Figure S2.** Methylation profile of *Dpp4*, *Mst4*, *Isl1*, *Gata5*, *Snap25*, *Uchl1*, *Crabp1* and *Npy* promoter regions in mesenteric vAT measured by Sequenom MassARRAY. The results are presented as average of percentage methylation  $\pm$  SEM for each CpG site or aggregate of CpG sites. Statistical analysis unpaired *t* test: #  $p < 0.05$ . *p,p'*-DDE, *p,p'*-dichlorodiphenyldichloroethylene; HF, high fat diet; TSS, transcription start site.

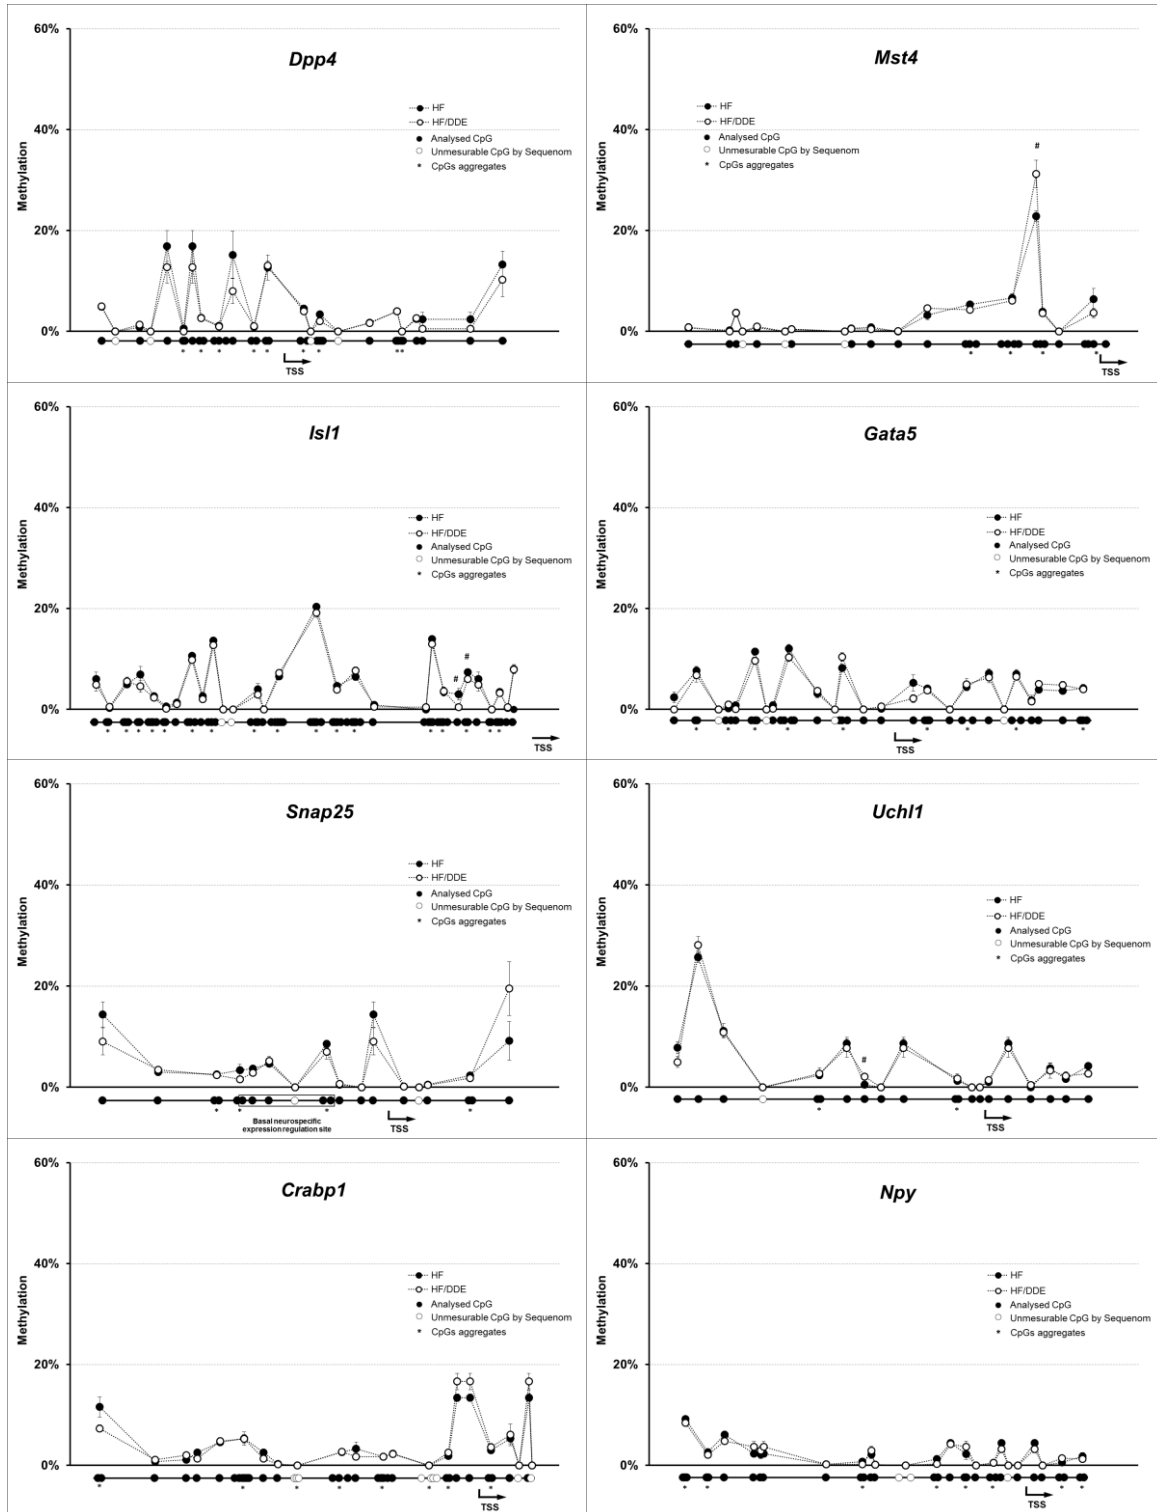

**Figure S3.** Validation of microarrays between HF/DDE and HF animals. Comparison of mRNA level of selected genes by microarray and qRT-PCR analysis. For the validation of microarray data, qRT-PCR results were analysed using REST 2009 ver. 2.0.13 (Qiagen, UK).

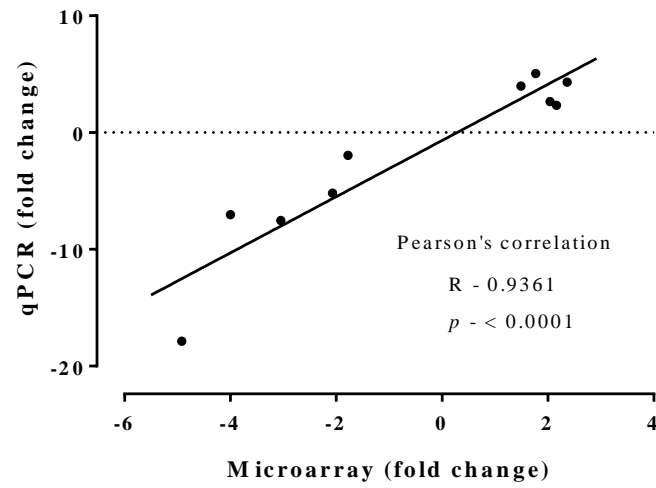

**Table S1.** Plasma and urine biochemical analyses performed at the end of treatment (12 weeks). Values are represented as mean  $\pm$  SEM. Statistical analysis with two-way ANOVA (main effects: diet, *p,p'*-DDE exposure and their interaction;  $p < 0.05$ ), followed by Tukey's multiple comparison post-hoc test: <sup>a</sup>  $p < 0.05$  vs St group; <sup>b</sup>  $p < 0.05$  vs St/DDE group; <sup>c</sup>  $p < 0.05$  vs HF group. St, standard diet; HF, high fat diet; *p,p'*-DDE, *p,p'*-dichlorodiphenyldichloroethylene; AST, aspartate aminotransferase; ALT, alanine aminotransferase; ALP, alkaline phosphatase; CK, creatine kinase.

| PLASMA                     |                     |                    |                               |                                    | Main effect ( <i>p</i> value) |                    |                           |
|----------------------------|---------------------|--------------------|-------------------------------|------------------------------------|-------------------------------|--------------------|---------------------------|
| Parameters                 | St                  | St/DDE             | HF                            | HF/DDE                             | Interaction                   | Diet               | <i>p,p'</i> -DDE exposure |
| <b>Metabolic markers</b>   |                     |                    |                               |                                    |                               |                    |                           |
| Uric acid (mg/dL)          | 0.50 $\pm$ 0.07     | 0.43 $\pm$ 0.04    | 0.45 $\pm$ 0.05               | 0.78 $\pm$ 0.05 <sup>abc</sup>     | <b>0.0015</b>                 | <b>0.0123</b>      | <b>0.0238</b>             |
| Lactate (mmol/L)           | 1.66 $\pm$ 0.15     | 1.46 $\pm$ 0.21    | 1.60 $\pm$ 0.12               | 2.35 $\pm$ 0.18 <sup>abc</sup>     | <b>0.0114</b>                 | <b>0.0251</b>      | n.s.                      |
| <b>Cell damage markers</b> |                     |                    |                               |                                    |                               |                    |                           |
| Amylase (U/L)              | 517.33 $\pm$ 21.71  | 478.33 $\pm$ 12.96 | 528.17 $\pm$ 12.26            | 593.83 $\pm$ 27.92 <sup>b</sup>    | <b>0.0156</b>                 | <b>0.0046</b>      | n.s.                      |
| AST (U/L)                  | 111.17 $\pm$ 22.14  | 83.33 $\pm$ 5.67   | 95.83 $\pm$ 5.96              | 157.83 $\pm$ 29.34 <sup>ab</sup>   | <b>0.0484</b>                 | <b>0.0208</b>      | n.s.                      |
| ALT (U/L)                  | 33.00 $\pm$ 4.77    | 27.67 $\pm$ 1.69   | 26.17 $\pm$ 1.30              | 30.83 $\pm$ 3.06                   | n.s.                          | n.s.               | n.s.                      |
| AST/ALT (U/L)              | 3.30 $\pm$ 0.19     | 3.06 $\pm$ 0.24    | 3.70 $\pm$ 0.27               | 5.02 $\pm$ 0.57 <sup>ab</sup>      | <b>0.0376</b>                 | <b>0.0031</b>      | n.s.                      |
| ALP (U/L)                  | 86.50 $\pm$ 4.46    | 83.50 $\pm$ 7.21   | 94.00 $\pm$ 11.37             | 106.50 $\pm$ 11.62                 | n.s.                          | n.s.               | n.s.                      |
| CK (U/L)                   | 397.33 $\pm$ 123.42 | 300.50 $\pm$ 51.47 | 346.00 $\pm$ 56.64            | 758.50 $\pm$ 126.45 <sup>abc</sup> | <b>0.0241</b>                 | <b>0.0038</b>      | <b>0.0134</b>             |
| URINE                      |                     |                    |                               |                                    | Main effect ( <i>p</i> value) |                    |                           |
| Parameters                 | St                  | St/DDE             | HF                            | HF/DDE                             | Interaction                   | Diet               | <i>p,p'</i> -DDE exposure |
| <b>Metabolic markers</b>   |                     |                    |                               |                                    |                               |                    |                           |
| Glucose (mg/day)           | 1.56 $\pm$ 0.71     | 1.32 $\pm$ 0.47    | 2.56 $\pm$ 0.24               | 3.69 $\pm$ 1.15                    | n.s.                          | <b>0.0301</b>      | n.s.                      |
| Microalbuminuria (mg/day)  | 0.04 $\pm$ 0.01     | 0.06 $\pm$ 0.01    | 0.05 $\pm$ 0.01               | 0.17 $\pm$ 0.06 <sup>ac</sup>      | n.s.                          | <b>0.0473</b>      | <b>0.0332</b>             |
| Urea (mg/day)              | 561.54 $\pm$ 45.56  | 542.02 $\pm$ 49.91 | 662.47 $\pm$ 50.11            | 861.15 $\pm$ 200.69                | n.s.                          | n.s.               | n.s.                      |
| Creatinine (mg/day)        | 16.04 $\pm$ 0.56    | 16.46 $\pm$ 1.97   | 13.69 $\pm$ 0.68              | 18.91 $\pm$ 4.31                   | n.s.                          | n.s.               | n.s.                      |
| <b>Ionogram</b>            |                     |                    |                               |                                    |                               |                    |                           |
| Sodium (mEq/day)           | 1.56 $\pm$ 0.10     | 1.62 $\pm$ 0.13    | 0.74 $\pm$ 0.08 <sup>ab</sup> | 0.81 $\pm$ 0.16 <sup>ab</sup>      | n.s.                          | <b>&lt; 0.0001</b> | n.s.                      |
| Chlorine (mEq/day)         | 2.03 $\pm$ 0.08     | 2.14 $\pm$ 0.16    | 0.84 $\pm$ 0.08 <sup>ab</sup> | 1.04 $\pm$ 0.28 <sup>ab</sup>      | n.s.                          | <b>&lt; 0.0001</b> | n.s.                      |

**Table S2.** Down- and up- regulated genes following exposure to HF/DDE compared to HF.

## Down-regulated genes

| Gene         | Fold change | p value | Affymetrix Cluster Id | Genebank                           | Description                                                                                                                         |
|--------------|-------------|---------|-----------------------|------------------------------------|-------------------------------------------------------------------------------------------------------------------------------------|
| Gal          | -4,92       | 0,01493 | 10727321              | J03624                             | galanin prepropeptide                                                                                                               |
| Snap25       | -4,00       | 0,01634 | 10840245              | BC087699                           | synaptosomal-associated protein 25                                                                                                  |
| Chrna3       | -3,20       | 0,01435 | 10917597              | X03440                             | cholinergic receptor, nicotinic, alpha 3                                                                                            |
| Uchl1        | -3,05       | 0,00925 | 10776739              | BC060573                           | ubiquitin carboxyl-terminal esterase L1 (ubiquitin thiolesterase)                                                                   |
| Syt1         | -3,03       | 0,01105 | 10902232              | DQ181550                           | synaptotagmin I                                                                                                                     |
| Calb2        | -3,01       | 0,00829 | 10810964              | BC087603                           | calbindin 2                                                                                                                         |
| Sst          | -2,88       | 0,00795 | 10751945              | M25890                             | somatostatin                                                                                                                        |
| Nmu          | -2,75       | 0,01868 | 10772231              | M94555                             | neuromedin U                                                                                                                        |
| Pcp4         | -2,72       | 0,02419 | 10750505              | AJ493658                           | Purkinje cell protein 4                                                                                                             |
| Scg2         | -2,69       | 0,01737 | 10929263              | M93669                             | secretogranin II (chromogranin C)                                                                                                   |
| Nefl         | -2,63       | 0,01306 | 10781266              | AF031880                           | neurofilament, light polypeptide                                                                                                    |
| Rab3b        | -2,45       | 0,01616 | 10870847              | BC060562                           | RAB3B, member RAS oncogene family                                                                                                   |
| Chrm2        | -2,34       | 0,01555 | 10854544              | J03025                             | cholinergic receptor, muscarinic 2                                                                                                  |
| Stmn2        | -2,19       | 0,00942 | 10822358              | BC087660                           | stathmin-like 2                                                                                                                     |
| Prph         | -2,09       | 0,01605 | 10899061              | AF031878                           | peripherin                                                                                                                          |
| Ass1         | -2,07       | 0,02046 | 10835355              | BC063146                           | argininosuccinate synthetase 1                                                                                                      |
| Crabp1       | -2,07       | 0,01788 | 10910089              |                                    | cellular retinoic acid binding protein 1                                                                                            |
| Tmem130      | -2,04       | 0,00698 | 10756597              |                                    | transmembrane protein 130                                                                                                           |
| Grem1        | -2,02       | 0,03137 | 10848281              | Y10019                             | gremlin 1, cysteine knot superfamily, homolog (Xenopus laevis)                                                                      |
| Ncam2        | -1,98       | 0,00921 | 10750002              | AY495695                           | neural cell adhesion molecule 2                                                                                                     |
| Bcat1        | -1,91       | 0,00507 | 10866819              | BC087710                           | branched chain aminotransferase 1, cytosolic                                                                                        |
| Rab6b        | -1,87       | 0,00605 | 10912631              |                                    | RAB6B, member RAS oncogene family                                                                                                   |
| Cartpt       | -1,86       | 0,03882 | 10820843              | U10071                             | CART prepropeptide                                                                                                                  |
| Znf804a      | -1,85       | 0,00634 | 10837241              |                                    | zinc finger protein 804A                                                                                                            |
| Rasd1        | -1,85       | 0,02462 | 10743227              | BC099136 A<br>F239157              | RAS, dexamethasone-induced 1                                                                                                        |
| Shc3         | -1,83       | 0,00043 | 10794261              |                                    | SHC (Src homology 2 domain containing) transforming protein 3                                                                       |
| Stmn3        | -1,83       | 0,01663 | 10852531              | AY004290                           | stathmin-like 3                                                                                                                     |
| LOC287167    | -1,82       | 0,02074 | 10741765              |                                    | globin, alpha                                                                                                                       |
| Hbb          | -1,80       | 0,02478 | 10724315              | M17084                             | hemoglobin, beta                                                                                                                    |
| Slc7a10 Lrp3 | -1,80       | 0,03128 | 10706134              | AB126813 B<br>C127467 AB<br>009463 | solute carrier family 7, (neutral amino acid transporter, y+ system) member 10   low density lipoprotein receptor-related protein 3 |
| L1cam        | -1,79       | 0,00656 | 10940195              |                                    | L1 cell adhesion molecule                                                                                                           |
| Cpne4        | -1,79       | 0,00701 | 10912718              |                                    | copine IV                                                                                                                           |
| Disp2        | -1,78       | 0,00483 | 10838683              |                                    | dispatched homolog 2 (Drosophila)                                                                                                   |
| Npy          | -1,78       | 0,01635 | 10855506              | M15880                             | neuropeptide Y                                                                                                                      |
|              | -1,76       | 0,02189 | 10939929              |                                    |                                                                                                                                     |
| Elavl4       | -1,74       | 0,02704 | 10878712              | BC158558                           | ELAV (embryonic lethal, abnormal vision, Drosophila)-like 4 (Hu antigen D)                                                          |
| Cend1        | -1,74       | 0,01097 | 10726821              | BC089963                           | cell cycle exit and neuronal differentiation 1                                                                                      |
| Cyp1b1       | -1,72       | 0,03501 | 10887947              | U09540                             | cytochrome P450, family 1, subfamily b, polypeptide 1                                                                               |

|                   |       |         |          |                                                                   |                                                                                             |
|-------------------|-------|---------|----------|-------------------------------------------------------------------|---------------------------------------------------------------------------------------------|
|                   | -1,72 | 0,01520 | 10917486 |                                                                   |                                                                                             |
| <b>Thy1</b>       | -1,72 | 0,00795 | 10909407 |                                                                   | Thy-1 cell surface antigen                                                                  |
| <b>Dpp6</b>       | -1,72 | 0,01120 | 10859886 | M76426                                                            | dipeptidylpeptidase 6                                                                       |
| <b>Scg3</b>       | -1,71 | 0,00541 | 10918738 | U02983                                                            | secretogranin III                                                                           |
| <b>RGD1305733</b> | -1,71 | 0,00868 | 10731235 | BC089943                                                          | similar to RIKEN cDNA 2900011008                                                            |
| <b>Necab1</b>     | -1,70 | 0,02031 | 10875616 | AF193755                                                          | N-terminal EF-hand calcium binding protein 1                                                |
| <b>Rab3c</b>      | -1,70 | 0,01626 | 10821243 | U54807                                                            | RAB3C, member RAS oncogene family                                                           |
| <b>Mab2112</b>    | -1,69 | 0,04848 | 10824089 |                                                                   | mab-21-like 2 (C. elegans)                                                                  |
| <b>Tpm2</b>       | -1,69 | 0,02920 | 10876324 | BC090009                                                          | tropomyosin 2, beta                                                                         |
| <b>Lix1</b>       | -1,68 | 0,02193 | 10703414 |                                                                   |                                                                                             |
| <b>Syng3</b>      | -1,67 | 0,00659 | 10741203 |                                                                   | synaptogyrin 3                                                                              |
| <b>Camk2b</b>     | -1,67 | 0,00131 | 10778268 | M16112 AF069731                                                   | calcium/calmodulin-dependent protein kinase II beta                                         |
| <b>Cadps</b>      | -1,67 | 0,00709 | 10779390 | U16802                                                            | Ca <sup>++</sup> -dependent secretion activator                                             |
| <b>Syt5</b>       | -1,65 | 0,00424 | 10704035 | BC092198                                                          | synaptotagmin V                                                                             |
| <b>Slc18a3</b>    | -1,65 | 0,01473 | 10790340 | U09211                                                            | solute carrier family 18 (vesicular acetylcholine), member 3                                |
| <b>Syp</b>        | -1,65 | 0,00817 | 10937103 | BC099798                                                          | synaptophysin                                                                               |
| <b>Nos1</b>       | -1,64 | 0,01236 | 10762455 | U67309                                                            | nitric oxide synthase 1, neuronal                                                           |
| <b>RGD1565284</b> | -1,63 | 0,00622 | 10734472 |                                                                   | similar to RIKEN cDNA A530088H08 gene                                                       |
| <b>Htr3a</b>      | -1,62 | 0,00761 | 10917123 |                                                                   | 5-hydroxytryptamine (serotonin) receptor 3a                                                 |
| <b>Gabrb3</b>     | -1,61 | 0,01857 | 10707582 | AY742860                                                          | gamma-aminobutyric acid (GABA) A receptor, beta 3                                           |
|                   |       |         |          | AF020758 U14414 AF020759 AF020756 AF020757 Y10475 AF064549 L43511 |                                                                                             |
| <b>P2rx2</b>      | -1,60 | 0,00392 | 10759383 |                                                                   | purinergic receptor P2X, ligand-gated ion channel, 2                                        |
| <b>Grp</b>        | -1,60 | 0,01160 | 10802331 | M31176                                                            | gastrin releasing peptide                                                                   |
| <b>Galn1</b>      | -1,59 | 0,01118 | 10805465 | U30290                                                            | galanin receptor 1                                                                          |
| <b>Pcsk1n</b>     | -1,59 | 0,01814 | 10936976 | AF181561                                                          | proprotein convertase subtilisin/kexin type 1 inhibitor                                     |
| <b>Tac2</b>       | -1,59 | 0,03138 | 10895980 | M16410                                                            | tachykinin 2                                                                                |
| <b>Ndr4</b>       | -1,58 | 0,01138 | 10809100 | AY217032                                                          | N-myc downstream regulated gene 4                                                           |
| <b>Nrsn1</b>      | -1,58 | 0,02881 | 10795077 | BC166881                                                          | neurensin 1                                                                                 |
|                   | -1,58 | 0,00014 | 10860779 |                                                                   |                                                                                             |
| <b>Vamp1</b>      | -1,57 | 0,01607 | 10858858 | BC092206                                                          | vesicle-associated membrane protein 1                                                       |
|                   |       |         |          | U40603 AF135265 AY344965 U55995 AB248959                          |                                                                                             |
| <b>Knma1</b>      | -1,56 | 0,04434 | 10778953 |                                                                   | potassium large conductance calcium-activated channel, subfamily M, alpha member 1          |
| <b>Faim2</b>      | -1,56 | 0,01537 | 10907165 | BC087606                                                          | Fas apoptotic inhibitory molecule 2                                                         |
| <b>Ina</b>        | -1,54 | 0,02182 | 10715900 |                                                                   | internexin neuronal intermediate filament protein, alpha                                    |
| <b>Mppd2</b>      | -1,54 | 0,00688 | 10838312 | AY093422                                                          | metallophosphoesterase domain containing 2                                                  |
| <b>Mapk10</b>     | -1,54 | 0,01520 | 10771267 | L27128                                                            | mitogen activated protein kinase 10                                                         |
| <b>Car14</b>      | -1,54 | 0,02398 | 10825100 | EF187253                                                          | carbonic anhydrase 14                                                                       |
| <b>Slc7a14</b>    | -1,53 | 0,01123 | 10814655 |                                                                   | solute carrier family 7 (cationic amino acid transporter, y <sup>+</sup> system), member 14 |
| <b>Hspb6</b>      | -1,52 | 0,02774 | 10706009 | D29960                                                            | heat shock protein, alpha-crystallin-related, B6                                            |
| <b>Sv2c</b>       | -1,52 | 0,02296 | 10820613 | AF060174                                                          | synaptic vesicle glycoprotein 2c                                                            |
| <b>Tmcc2</b>      | -1,51 | 0,03047 | 10767597 |                                                                   | transmembrane and coiled-coil domain family 2                                               |
| <b>LOC500105</b>  | -1,51 | 0,00607 | 10855138 |                                                                   | similar to contactin associated protein-like 2 isoform a                                    |

|                                      |              |                |          |                       |                                                                                                 |
|--------------------------------------|--------------|----------------|----------|-----------------------|-------------------------------------------------------------------------------------------------|
| <b>Gabra3</b>                        | <b>-1,51</b> | <b>0,00828</b> | 10940090 |                       | gamma-aminobutyric acid (GABA) A receptor, alpha 3                                              |
| <b>Aldoc</b>                         | <b>-1,50</b> | <b>0,01706</b> | 10745095 | BC099749              | aldolase C, fructose-bisphosphate                                                               |
| <b>Ngfr</b>                          | <b>-1,50</b> | <b>0,00850</b> | 10746538 |                       | nerve growth factor receptor (TNFR superfamily, member 16)                                      |
| <b>Kcnb2</b>                         | <b>-1,50</b> | <b>0,01776</b> | 10874952 | M77482                | potassium voltage gated channel, Shab-related subfamily, member 2                               |
| <b>Cd24</b>                          | <b>-1,50</b> | <b>0,02119</b> | 10830624 | BC064439              | CD24 molecule                                                                                   |
| <b>Scgn</b>                          | <b>-1,50</b> | <b>0,00150</b> | 10795162 | AY513659              | secretagogin, EF-hand calcium binding protein                                                   |
| <b>Adh1</b>                          | <b>-1,50</b> | <b>0,03483</b> | 10819379 | BC062403              | alcohol dehydrogenase 1 (class I)                                                               |
| <b>Pclo</b>                          | <b>-1,50</b> | <b>0,00226</b> | 10860421 | AF227534 A<br>F138789 | piccolo (presynaptic cytomatrix protein)                                                        |
| <b>LOC681994</b>                     | <b>-1,49</b> | <b>0,01046</b> | 10812390 |                       | similar to developmental endothelial locus-1 isoform b                                          |
| <b>Htr1b</b>                         | <b>-1,49</b> | <b>0,00730</b> | 10918979 |                       | 5-hydroxytryptamine (serotonin) receptor 1B                                                     |
| <b>Syt17</b>                         | <b>-1,49</b> | <b>0,00278</b> | 10725235 | U30831                | synaptotagmin XVII                                                                              |
| <b>Lgi1</b>                          | <b>-1,48</b> | <b>0,00763</b> | 10715146 | BC089222              | leucine-rich, glioma inactivated 1                                                              |
| <b>Chrn4</b>                         | <b>-1,48</b> | <b>0,00861</b> | 10917607 | U42976                | cholinergic receptor, nicotinic, beta 4                                                         |
| <b>Rit2</b>                          | <b>-1,48</b> | <b>0,04004</b> | 10803571 | BC091382              | Ras-like without CAAX 2                                                                         |
| <b>Mllt11</b>                        | <b>-1,48</b> | <b>0,00474</b> | 10824965 | BC087583              | myeloid/lymphoid or mixed-lineage leukemia (trithorax homolog, Drosophila); translocated to, 11 |
| <b>Dpp10</b>                         | <b>-1,48</b> | <b>0,03054</b> | 10767203 | DQ857325              | dipeptidylpeptidase 10                                                                          |
| <b>Kif1a</b>                         | <b>-1,47</b> | <b>0,00595</b> | 10929937 | AM180765              | kinesin family member 1A                                                                        |
| <b>Zcchc12</b>                       | <b>-1,47</b> | <b>0,01820</b> | 10936360 | BC089115              | zinc finger, CCHC domain containing 12                                                          |
|                                      | <b>-1,47</b> | <b>0,03937</b> | 10770328 |                       |                                                                                                 |
| <b>Gpr149</b>                        | <b>-1,47</b> | <b>0,03399</b> | 10823412 | AY030276              | G protein-coupled receptor 149                                                                  |
| <b>Cnr1</b>                          | <b>-1,47</b> | <b>0,00246</b> | 10868186 | U40395                | cannabinoid receptor 1 (brain)                                                                  |
| <b>Tubb2b</b>                        | <b>-1,46</b> | <b>0,03827</b> | 10794824 | BC105754              | tubulin, beta 2b                                                                                |
| <b>Resp18</b>                        | <b>-1,45</b> | <b>0,00273</b> | 10929153 | L25633                | regulated endocrine-specific protein 18                                                         |
| <b>Nell2</b>                         | <b>-1,45</b> | <b>0,01221</b> | 10906546 | BC093617              | NEL-like 2 (chicken)                                                                            |
| <b>Snap91</b>                        | <b>-1,45</b> | <b>0,01742</b> | 10919118 |                       | synaptosomal-associated protein 91                                                              |
| <b>Slc6a15</b>                       | <b>-1,45</b> | <b>0,03612</b> | 10895251 | L22022                | solute carrier family 6 (neutral amino acid transporter), member 15                             |
| <b>Nell1</b>                         | <b>-1,44</b> | <b>0,02400</b> | 10707275 | U48246                | NEL-like 1 (chicken)                                                                            |
| <b>Tagln3</b>                        | <b>-1,43</b> | <b>0,01815</b> | 10751048 | AF459788              | transgelin 3                                                                                    |
|                                      | <b>-1,43</b> | <b>0,01977</b> | 10808167 |                       |                                                                                                 |
|                                      | <b>-1,43</b> | <b>0,00537</b> | 10759636 |                       |                                                                                                 |
| <b>Gap43</b>                         | <b>-1,42</b> | <b>0,01072</b> | 10751218 | M16736                | growth associated protein 43                                                                    |
| <b>Rab3a</b>                         | <b>-1,42</b> | <b>0,00328</b> | 10790912 | BC087580              | RAB3A, member RAS oncogene family                                                               |
| <b>Sntg2</b>                         | <b>-1,42</b> | <b>0,04256</b> | 10889495 |                       | syntrophin, gamma 2                                                                             |
| <b>Slc10a4</b>                       | <b>-1,42</b> | <b>0,01098</b> | 10776582 | AY704415              | solute carrier family 10 (sodium/bile acid cotransporter family), member 4                      |
| <b>LOC689982 LOC316460 LOC689991</b> | <b>-1,42</b> | <b>0,00237</b> | 10924035 |                       | similar to CG18437-PA                                                                           |
| <b>S1pr3</b>                         | <b>-1,41</b> | <b>0,00184</b> | 10797566 |                       | sphingosine-1-phosphate receptor 3                                                              |
| <b>Unc79</b>                         | <b>-1,41</b> | <b>0,00047</b> | 10886509 |                       | unc-79 homolog (C. elegans)                                                                     |
| <b>Sorcs1</b>                        | <b>-1,41</b> | <b>0,01065</b> | 10730794 |                       | sortilin-related VPS10 domain containing receptor 1                                             |
| <b>Tacr3</b>                         | <b>-1,41</b> | <b>0,02178</b> | 10819139 | J05189                | tachykinin receptor 3                                                                           |
| <b>Nsg2</b>                          | <b>-1,41</b> | <b>0,01873</b> | 10741804 | BC105916              | neuron specific gene family member 2                                                            |
| <b>Tox</b>                           | <b>-1,41</b> | <b>0,00817</b> | 10875363 |                       | thymocyte selection-associated high mobility group box                                          |
| <b>Scube1</b>                        | <b>-1,41</b> | <b>0,00227</b> | 10905843 |                       | signal peptide, CUB domain, EGF-like 1                                                          |
| <b>Ret</b>                           | <b>-1,40</b> | <b>0,02194</b> | 10864918 |                       | ret proto-oncogene                                                                              |
| <b>Ptprn</b>                         | <b>-1,40</b> | <b>0,00366</b> | 10929128 | U40652                | protein tyrosine phosphatase, receptor type, N                                                  |



|                        |              |                |          |                     |                                                                                                         |
|------------------------|--------------|----------------|----------|---------------------|---------------------------------------------------------------------------------------------------------|
| <b>Crtac1</b>          | <b>-1,40</b> | <b>0,01820</b> | 10715431 | U78304              | cartilage acidic protein 1                                                                              |
| <b>Ap3b2</b>           | <b>-1,40</b> | <b>0,00242</b> | 10723253 |                     | adaptor-related protein complex 3, beta 2 subunit                                                       |
| <b>Ank2</b>            | <b>-1,40</b> | <b>0,01701</b> | 10826616 | U65916              | ankyrin 2, neuronal                                                                                     |
| <b>LOC306096</b>       | <b>-1,39</b> | <b>0,00377</b> | 10785545 |                     | similar to Dachshund homolog 1 (Dach1)                                                                  |
| <b>Map1a</b>           | <b>-1,39</b> | <b>0,00319</b> | 10839135 | M83196              | microtubule-associated protein 1A                                                                       |
| <b>Entpd3</b>          | <b>-1,39</b> | <b>0,02026</b> | 10914354 |                     | ectonucleoside triphosphate diphosphohydrolase 3                                                        |
| <b>Phox2b</b>          | <b>-1,39</b> | <b>0,03130</b> | 10772629 |                     | paired-like homeobox 2b                                                                                 |
| <b>Phosphol1</b>       | <b>-1,39</b> | <b>0,00091</b> | 10737659 | BC169002            | phosphatase, orphan 1                                                                                   |
| <b>Dgki</b>            | <b>-1,39</b> | <b>0,02218</b> | 10861843 | AB058964            | diacylglycerol kinase, iota                                                                             |
| <b>Olfm1</b>           | <b>-1,39</b> | <b>0,02987</b> | 10834800 | U03417              | olfactomedin 1                                                                                          |
| <b>Reep1</b>           | <b>-1,39</b> | <b>0,00514</b> | 10856296 |                     | receptor accessory protein 1                                                                            |
| <b>Wbp2</b>            | <b>-1,39</b> | <b>0,01035</b> | 10749108 | AF499026            | WW domain binding protein 2                                                                             |
| <b>Wasf1</b>           | <b>-1,39</b> | <b>0,01682</b> | 10833952 | BC091322            | WAS protein family, member 1                                                                            |
| <b>Unc5b</b>           | <b>-1,38</b> | <b>0,01144</b> | 10833013 | U87306              | unc-5 homolog B (C. elegans)                                                                            |
| <b>Dpysl3</b>          | <b>-1,38</b> | <b>0,02057</b> | 10804245 | AF389425            | dihydropyrimidinase-like 3                                                                              |
| <b>Atxn7l1</b>         | <b>-1,38</b> | <b>0,00227</b> | 10884189 |                     | ataxin 7-like 1                                                                                         |
| <b>Aldh1a1 Aldh1a7</b> | <b>-1,38</b> | <b>0,02809</b> | 10714323 | AF001898 <br>M23995 | aldehyde dehydrogenase 1 family, member A1   aldehyde dehydrogenase family 1, subfamily A7              |
| <b>Cnih2</b>           | <b>-1,38</b> | <b>0,01831</b> | 10727728 | BC091325            | cornichon homolog 2 (Drosophila)                                                                        |
| <b>Mettl7b</b>         | <b>-1,38</b> | <b>0,01381</b> | 10899964 | BC092587            | methyltransferase like 7B                                                                               |
| <b>Adcy1</b>           | <b>-1,38</b> | <b>0,01161</b> | 10774120 |                     | adenylate cyclase 1 (brain)                                                                             |
| <b>Slc35d3</b>         | <b>-1,37</b> | <b>0,01635</b> | 10717053 |                     | solute carrier family 35, member D3                                                                     |
| <b>Sgca</b>            | <b>-1,37</b> | <b>0,02469</b> | 10746458 |                     | sarcoglycan, alpha (dystrophin-associated glycoprotein)                                                 |
| <b>Dmpk</b>            | <b>-1,37</b> | <b>0,02460</b> | 10704728 |                     | dystrophia myotonica-protein kinase                                                                     |
| <b>Slitrk1</b>         | <b>-1,37</b> | <b>0,02513</b> | 10785782 |                     | SLIT and NTRK-like family, member 1                                                                     |
| <b>Wdr6 Dalrd3</b>     | <b>-1,37</b> | <b>0,00508</b> | 10920313 | BC084708            | WD repeat domain 6   DALR anticodon binding domain containing 3                                         |
| <b>Snurf Snrpn</b>     | <b>-1,37</b> | <b>0,03184</b> | 10798943 | AF101041 <br>M29293 | SNRPN upstream reading frame   small nuclear ribonucleoprotein polypeptide N                            |
| <b>Lrp12</b>           | <b>-1,36</b> | <b>0,00559</b> | 10903503 |                     | low density lipoprotein-related protein 12                                                              |
| <b>Cacna1e</b>         | <b>-1,36</b> | <b>0,02219</b> | 10768765 | L15453              | calcium channel, voltage-dependent, R type, alpha 1E subunit                                            |
|                        | <b>-1,36</b> | <b>0,00480</b> | 10854030 |                     |                                                                                                         |
| <b>Tmem109</b>         | <b>-1,36</b> | <b>0,01053</b> | 10728812 | BC078955            | transmembrane protein 109                                                                               |
| <b>Rab9b</b>           | <b>-1,36</b> | <b>0,03220</b> | 10939460 |                     | RAB9B, member RAS oncogene family                                                                       |
| <b>Odz4</b>            | <b>-1,36</b> | <b>0,01491</b> | 10708695 |                     | odz, odd Oz/ten-m homolog 4 (Drosophila)                                                                |
| <b>Nmnat2</b>          | <b>-1,36</b> | <b>0,02147</b> | 10764736 | DQ022370            | nicotinamide nucleotide adenyltransferase 2                                                             |
| <b>LOC679750</b>       | <b>-1,36</b> | <b>0,01046</b> | 10760568 |                     | similar to Salivary gland secretion 1 CG3047-PA                                                         |
| <b>Tcp1l1l</b>         | <b>-1,36</b> | <b>0,00271</b> | 10847924 |                     | t-complex 11 like 1                                                                                     |
| <b>Clip3</b>           | <b>-1,35</b> | <b>0,00804</b> | 10705835 |                     | CAP-GLY domain containing linker protein 3                                                              |
| <b>Nkx2-3</b>          | <b>-1,35</b> | <b>0,02542</b> | 10730266 |                     | NK2 transcription factor related, locus 3 (Drosophila)                                                  |
| <b>RGD1562449</b>      | <b>-1,35</b> | <b>0,02558</b> | 10867895 |                     | similar to hypothetical protein MGC2817                                                                 |
| <b>Lrrn2</b>           | <b>-1,35</b> | <b>0,00301</b> | 10763933 |                     | leucine rich repeat neuronal 2                                                                          |
| <b>Gpr81</b>           | <b>-1,35</b> | <b>0,04268</b> | 10758349 | EU809461            | G protein-coupled receptor 81                                                                           |
| <b>Slc1a1</b>          | <b>-1,35</b> | <b>0,00246</b> | 10714616 | D63772              | solute carrier family 1 (neuronal/epithelial high affinity glutamate transporter, system Xag), member 1 |
| <b>Pcdh1</b>           | <b>-1,35</b> | <b>0,00557</b> | 10804117 | DQ863133            | protocadherin 1                                                                                         |
| <b>Mylk</b>            | <b>-1,35</b> | <b>0,04070</b> | 10754510 |                     | myosin light chain kinase                                                                               |
| <b>Cfil1</b>           | <b>-1,34</b> | <b>0,01011</b> | 10713074 | BC086533            | cofilin 1, non-muscle                                                                                   |

|                                       |       |                |          |                                                                   |                                                                                        |
|---------------------------------------|-------|----------------|----------|-------------------------------------------------------------------|----------------------------------------------------------------------------------------|
| <b>Tubb3</b>                          | -1,34 | <b>0,04008</b> | 10808702 | BC097281                                                          | tubulin, beta 3                                                                        |
| <b>Clstn3</b>                         | -1,34 | <b>0,01286</b> | 10865420 |                                                                   | calsyntenin 3                                                                          |
| <b>Gstm4 L<br/>OC10019<br/>6943</b>   | -1,34 | <b>0,01786</b> | 10825931 | BC091199 F<br>J179403                                             | glutathione S-transferase mu 4   glutathione S-transferase mu 3                        |
| <b>Cntn5</b>                          | -1,34 | <b>0,00993</b> | 10914882 | D87212                                                            | contactin 5                                                                            |
| <b>Nkain1</b>                         | -1,34 | <b>0,00702</b> | 10880163 |                                                                   | Na+/K+ transporting ATPase interacting 1                                               |
| <b>LOC6899<br/>63</b>                 | -1,34 | <b>0,03625</b> | 10859136 |                                                                   |                                                                                        |
| <b>Tp53i11</b>                        | -1,34 | <b>0,01158</b> | 10838056 | BC167758                                                          | tumor protein p53 inducible protein 11                                                 |
| <b>Ldlr</b>                           | -1,34 | <b>0,00369</b> | 10908521 |                                                                   | low density lipoprotein receptor                                                       |
| <b>Ntrk3</b>                          | -1,33 | <b>0,03820</b> | 10722864 | L14447 L14<br>446 L03813 <br>L14445 BC0<br>78844                  | neurotrophic tyrosine kinase, receptor, type 3                                         |
| <b>Obfc2b</b>                         | -1,33 | <b>0,00796</b> | 10899775 | BC104710                                                          | oligonucleotide/oligosaccharide-binding fold containing 2B                             |
| <b>Slc25a10</b>                       | -1,33 | <b>0,01069</b> | 10740159 | BC081734                                                          | solute carrier family 25 (mitochondrial carrier; dicarboxylate transporter), member 10 |
| <b>Gfra2</b>                          | -1,33 | <b>0,01775</b> | 10781410 | AF003825                                                          | GDNF family receptor alpha 2                                                           |
| <b>Cacna1b</b>                        | -1,33 | <b>0,00455</b> | 10843229 | AF055477                                                          | calcium channel, voltage-dependent, N type, alpha 1B subunit                           |
| <b>Hpcal</b>                          | -1,32 | <b>0,01335</b> | 10879963 | D12573                                                            | hippocalcin                                                                            |
| <b>Sh2d3c</b>                         | -1,32 | <b>0,01792</b> | 10835604 | BC158641                                                          | SH2 domain containing 3C                                                               |
| <b>G0s2</b>                           | -1,32 | <b>0,00868</b> | 10770807 | BC088248                                                          | G0/G1switch 2                                                                          |
| <b>Bruno4</b>                         | -1,32 | <b>0,01466</b> | 10803542 |                                                                   | bruno-like 4, RNA binding protein (Drosophila)                                         |
| <b>Bean</b>                           | -1,32 | <b>0,01513</b> | 10809044 |                                                                   | brain expressed, associated with Nedd4                                                 |
| <b>MAST1</b>                          | -1,32 | <b>0,00269</b> | 10806601 | AY227207                                                          | microtubule associated serine/threonine kinase 1                                       |
| <b>Mapk8ip2</b>                       | -1,32 | <b>0,01132</b> | 10898606 | BC105884 X<br>57281                                               | mitogen-activated protein kinase 8 interacting protein 2                               |
| <b>RGD1562<br/>533</b>                | -1,32 | <b>0,00492</b> | 10760024 | BC127538                                                          | similar to mKIAA0774 protein                                                           |
| <b>Fam70b</b>                         | -1,32 | <b>0,02377</b> | 10792734 | BC169123                                                          | family with sequence similarity 70, member B                                           |
| <b>Thbs4</b>                          | -1,32 | <b>0,02993</b> | 10820434 | X89963                                                            | thrombospondin 4                                                                       |
| <b>Astn1</b>                          | -1,32 | <b>0,04297</b> | 10764918 |                                                                   | astrotactin 1                                                                          |
| <b>Lfng</b>                           | -1,32 | <b>0,00657</b> | 10760594 | BC070933                                                          | LFNG O-fucosylpeptide 3-beta-N-acetylglucosaminyltransferase                           |
| <b>Abcd1</b>                          | -1,31 | <b>0,02778</b> | 10935949 |                                                                   | ATP-binding cassette, sub-family D (ALD), member 1                                     |
| <b>Tgfb1i1</b>                        | -1,31 | <b>0,02605</b> | 10711364 | AF314960                                                          | transforming growth factor beta 1 induced transcript 1                                 |
| <b>Pnpla3</b>                         | -1,31 | <b>0,01008</b> | 10898203 | BC161881                                                          | patatin-like phospholipase domain containing 3                                         |
| <b>Kif3c</b>                          | -1,31 | <b>0,00241</b> | 10883311 | AJ223599                                                          | kinesin family member 3C                                                               |
| <b>LOC6856<br/>01</b>                 | -1,31 | <b>0,00623</b> | 10865236 |                                                                   | similar to MICAL CG33208-PB, isoform B                                                 |
| <b>Ptprz1</b>                         | -1,31 | <b>0,01869</b> | 10853963 | U09357                                                            | protein tyrosine phosphatase, receptor-type, Z polypeptide 1                           |
| <b>Dock6</b>                          | -1,31 | <b>0,02326</b> | 10908543 | BC160867                                                          | dedicator of cytokinesis 6                                                             |
|                                       | -1,31 | <b>0,00970</b> | 10884667 |                                                                   |                                                                                        |
| <b>Rbpms2</b>                         | -1,31 | <b>0,02106</b> | 10911001 | BC169038                                                          | RNA binding protein with multiple splicing 2                                           |
| <b>RGD1307<br/>525 LOC2<br/>92199</b> | -1,31 | <b>0,01583</b> | 10717421 |                                                                   | similar to intracellular protein transport like (XM453)   hypothetical LOC292199       |
| <b>Slc27a1</b>                        | -1,31 | <b>0,03355</b> | 10787313 | BC074014                                                          | solute carrier family 27 (fatty acid transporter), member 1                            |
| <b>Maob</b>                           | -1,30 | <b>0,01867</b> | 10932211 | M23601                                                            | monoamine oxidase B                                                                    |
| <b>Olr1622</b>                        | -1,30 | <b>0,00065</b> | 10779788 |                                                                   | olfactory receptor 1622                                                                |
| <b>Cby1</b>                           | -1,30 | <b>0,00456</b> | 10897698 | AF393211                                                          | chibby homolog 1 (Drosophila)                                                          |
| <b>Lphn1</b>                          | -1,30 | <b>0,00130</b> | 10810236 | AF081145 A<br>F081147 U7<br>8105 AF081<br>144 AF0811<br>46 U72487 | latrophilin 1                                                                          |

|                                      |              |                |          | AF111099 |                                                                                                                  |
|--------------------------------------|--------------|----------------|----------|----------|------------------------------------------------------------------------------------------------------------------|
| <b>RGD1307218</b>                    | <b>-1,30</b> | <b>0,00403</b> | 10876730 | BC089972 | similar to RIKEN cDNA 2810432L12                                                                                 |
| <b>Smyd1</b>                         | <b>-1,30</b> | <b>0,01335</b> | 10863104 |          | SET and MYND domain containing 1                                                                                 |
| <b>Ap1s1</b>                         | <b>-1,30</b> | <b>0,00422</b> | 10761042 | BC169070 | adaptor-related protein complex 1, sigma 1 subunit                                                               |
| <b>Tox3</b>                          | <b>-1,30</b> | <b>0,00120</b> | 10806303 | EU194254 | TOX high mobility group box family member 3                                                                      |
| <b>Nudt14</b>                        | <b>-1,30</b> | <b>0,01884</b> | 10892381 |          | nudix (nucleoside diphosphate linked moiety X)-type motif 14                                                     |
| <b>Gramd1b</b>                       | <b>-1,30</b> | <b>0,00037</b> | 10916432 |          | GRAM domain containing 1B                                                                                        |
| <b>Scube2</b>                        | <b>-1,30</b> | <b>0,04505</b> | 10724792 |          | signal peptide, CUB domain, EGF-like 2                                                                           |
| <b>Dcun1d3</b>                       | <b>-1,30</b> | <b>0,00371</b> | 10725340 | BC097462 | DCN1, defective in cullin neddylation 1, domain containing 3 ( <i>S. cerevisiae</i> )                            |
|                                      | <b>-1,29</b> | <b>0,00067</b> | 10896630 |          |                                                                                                                  |
| <b>Enah</b>                          | <b>-1,29</b> | <b>0,03434</b> | 10770412 | BC083927 | enabled homolog ( <i>Drosophila</i> )                                                                            |
| <b>Gga1</b>                          | <b>-1,29</b> | <b>0,01165</b> | 10897485 | BC090031 | golgi associated, gamma adaptin ear containing, ARF binding protein 1                                            |
| <b>Tmem53</b>                        | <b>-1,29</b> | <b>0,00727</b> | 10871419 |          | transmembrane protein 53                                                                                         |
| <b>Dda1</b>                          | <b>-1,29</b> | <b>0,00044</b> | 10787284 |          | DET1 and DDB1 associated 1                                                                                       |
| <b>Dpys15</b>                        | <b>-1,29</b> | <b>0,03159</b> | 10889007 | AB029432 | dihydropyrimidinase-like 5                                                                                       |
| <b>Tmem90b</b>                       | <b>-1,29</b> | <b>0,01359</b> | 10840613 | BC092131 | transmembrane protein 90B                                                                                        |
|                                      | <b>-1,29</b> | <b>0,04738</b> | 10818571 |          |                                                                                                                  |
|                                      | <b>-1,29</b> | <b>0,04751</b> | 10908096 |          |                                                                                                                  |
| <b>Dcun1d3</b>                       | <b>-1,29</b> | <b>0,00723</b> | 10718643 | BC097462 | DCN1, defective in cullin neddylation 1, domain containing 3 ( <i>S. cerevisiae</i> )                            |
| <b>Hspa2</b>                         | <b>-1,29</b> | <b>0,03935</b> | 10885400 | BC081803 | heat shock protein alpha 2                                                                                       |
| <b>Repin1</b>                        | <b>-1,29</b> | <b>0,00147</b> | 10855367 | AY691175 | replication initiator 1                                                                                          |
| <b>Slc6a8</b>                        | <b>-1,29</b> | <b>0,00337</b> | 10935935 | BC168238 | solute carrier family 6 (neurotransmitter transporter, creatine), member 8                                       |
| <b>Nxph4</b>                         | <b>-1,29</b> | <b>0,00790</b> | 10903074 | BC081805 | neurexophilin 4                                                                                                  |
| <b>Auts2l</b>                        | <b>-1,28</b> | <b>0,00686</b> | 10761297 |          | autism susceptibility candidate 2-like                                                                           |
| <b>Synm</b>                          | <b>-1,28</b> | <b>0,03827</b> | 10722694 | AB091769 | synemin, intermediate filament protein                                                                           |
| <b>Zfp385a</b>                       | <b>-1,28</b> | <b>0,02102</b> | 10907681 | BC166729 | zinc finger protein 385A                                                                                         |
| <b>Ttyh2</b>                         | <b>-1,28</b> | <b>0,00034</b> | 10739399 |          | tweety homolog 2 ( <i>Drosophila</i> )                                                                           |
| <b>Tmem177</b>                       | <b>-1,28</b> | <b>0,00613</b> | 10767162 | BC098688 | transmembrane protein 177                                                                                        |
| <b>LOC689982 LOC316460 LOC689991</b> | <b>-1,28</b> | <b>0,00185</b> | 10924044 |          | similar to CG18437-PA                                                                                            |
| <b>Prps1</b>                         | <b>-1,28</b> | <b>0,03272</b> | 10935204 | BC078853 | phosphoribosyl pyrophosphate synthetase 1                                                                        |
|                                      | <b>-1,28</b> | <b>0,03200</b> | 10871771 |          |                                                                                                                  |
| <b>Zfp2</b>                          | <b>-1,28</b> | <b>0,00109</b> | 10896337 |          | zinc finger protein, multitype 2                                                                                 |
| <b>Stxbp1</b>                        | <b>-1,28</b> | <b>0,00331</b> | 10844390 | BC088850 | syntaxin binding protein 1                                                                                       |
| <b>Kcnk2</b>                         | <b>-1,28</b> | <b>0,02198</b> | 10770637 | AF325671 | potassium channel, subfamily K, member 2                                                                         |
| <b>Raver2</b>                        | <b>-1,28</b> | <b>0,03385</b> | 10870240 |          | ribonucleoprotein, PTB-binding 2                                                                                 |
| <b>Bcl9l</b>                         | <b>-1,28</b> | <b>0,00801</b> | 10909527 |          | B-cell CLL/lymphoma 9-like                                                                                       |
| <b>Arl2</b>                          | <b>-1,28</b> | <b>0,00436</b> | 10728159 |          | ADP-ribosylation factor-like 2                                                                                   |
| <b>Kcnb1</b>                         | <b>-1,28</b> | <b>0,00705</b> | 10851943 |          | potassium voltage gated channel, Shab-related subfamily, member 1                                                |
| <b>Dnajc30</b>                       | <b>-1,27</b> | <b>0,04720</b> | 10761225 | BC166911 | DnaJ (Hsp40) homolog, subfamily C, member 30                                                                     |
| <b>Magmas</b>                        | <b>-1,27</b> | <b>0,03509</b> | 10731783 |          | mitochondria-associated protein involved in granulocyte-macrophage colony-stimulating factor signal transduction |
| <b>RGD1566149</b>                    | <b>-1,27</b> | <b>0,00955</b> | 10745222 |          | similar to CDNA sequence BC017647                                                                                |
| <b>Cnm1</b>                          | <b>-1,27</b> | <b>0,00867</b> | 10730272 |          | cyclin M1                                                                                                        |
| <b>Efemp2</b>                        | <b>-1,27</b> | <b>0,00992</b> | 10713061 | BC083804 | EGF-containing fibulin-like extracellular matrix protein 2                                                       |

|                     |       |                |          |                                |                                                                                                    |
|---------------------|-------|----------------|----------|--------------------------------|----------------------------------------------------------------------------------------------------|
| <b>Abcb1a</b>       | -1,27 | <b>0,00800</b> | 10853300 | AF257746                       | ATP-binding cassette, sub-family B (MDR/TAP), member 1A                                            |
| <b>Gabrg3</b>       | -1,27 | <b>0,04078</b> | 10722328 | M81142                         | gamma-aminobutyric acid (GABA) A receptor, gamma 3                                                 |
| <b>Anapc2</b>       | -1,27 | <b>0,00086</b> | 10834168 | BC166796                       | anaphase promoting complex subunit 2                                                               |
| <b>Alg3</b>         | -1,27 | <b>0,00654</b> | 10752137 | BC088475                       | asparagine-linked glycosylation 3, alpha-1,3- mannosyltransferase homolog ( <i>S. cerevisiae</i> ) |
| <b>Leng4</b>        | -1,27 | <b>0,03331</b> | 10703715 | BC169089                       | leukocyte receptor cluster (LRC) member 4                                                          |
| <b>Lrrn1</b>        | -1,27 | <b>0,03496</b> | 10857541 | BC107902                       | leucine rich repeat neuronal 1                                                                     |
| <b>Ccdc69</b>       | -1,27 | <b>0,02666</b> | 10742744 |                                | coiled-coil domain containing 69                                                                   |
| <b>Chrna5</b>       | -1,27 | <b>0,01274</b> | 10910133 | J05231                         | cholinergic receptor, nicotinic, alpha 5                                                           |
| <b>Sardh</b>        | -1,27 | <b>0,00138</b> | 10843938 | AF067650                       | sarcosine dehydrogenase                                                                            |
| <b>Myom1</b>        | -1,27 | <b>0,04698</b> | 10925991 | AY177416                       | myomesin 1                                                                                         |
| <b>Pdgfb</b>        | -1,27 | <b>0,03436</b> | 10905521 |                                | platelet-derived growth factor beta polypeptide (simian sarcoma viral (v-sis) oncogene homolog)    |
|                     | -1,27 | <b>0,00265</b> | 10723900 |                                |                                                                                                    |
| <b>Niacr1</b>       | -1,27 | <b>0,01714</b> | 10758351 | AB103062                       | niacin receptor 1                                                                                  |
| <b>Chst2</b>        | -1,27 | <b>0,01549</b> | 10919328 |                                | carbohydrate sulfotransferase 2                                                                    |
| <b>Cox4i2</b>       | -1,26 | <b>0,02893</b> | 10840895 | AF255347                       | cytochrome c oxidase subunit IV isoform 2                                                          |
| <b>Brsk1</b>        | -1,26 | <b>0,00909</b> | 10718881 | AB365521                       | BR serine/threonine kinase 1                                                                       |
| <b>Itga7</b>        | -1,26 | <b>0,01180</b> | 10893267 | BC088846 X<br>65036 X742<br>93 | integrin, alpha 7                                                                                  |
| <b>Ldoc1l</b>       | -1,26 | <b>0,02076</b> | 10905915 |                                | leucine zipper, down-regulated in cancer 1-like                                                    |
| <b>Arhgef18</b>     | -1,26 | <b>0,00134</b> | 10759729 |                                | rho/rac guanine nucleotide exchange factor (GEF) 18                                                |
| <b>Wiz</b>          | -1,26 | <b>0,00930</b> | 10901002 |                                | widely-interspaced zinc finger motifs                                                              |
| <b>Sv2a</b>         | -1,26 | <b>0,03139</b> | 10817512 | L05435                         | synaptic vesicle glycoprotein 2a                                                                   |
| <b>Gnao1</b>        | -1,26 | <b>0,02363</b> | 10809428 | M17526                         | guanine nucleotide binding protein (G protein), alpha activating activity polypeptide O            |
| <b>Coro2b</b>       | -1,26 | <b>0,04235</b> | 10918075 | BC089991                       | coronin, actin binding protein, 2B                                                                 |
| <b>Clip4</b>        | -1,26 | <b>0,02266</b> | 10888620 | BC081910                       | CAP-GLY domain containing linker protein family, member 4                                          |
| <b>Atp6v0e2</b>     | -1,26 | <b>0,01621</b> | 10855356 | BC089958                       | ATPase, H <sup>+</sup> transporting V0 subunit e2                                                  |
| <b>Syn1</b>         | -1,26 | <b>0,00226</b> | 10932107 | M27812                         | synapsin I                                                                                         |
| <b>Mccc2</b>        | -1,26 | <b>0,01067</b> | 10820847 | BC083581                       | methylcrotonoyl-Coenzyme A carboxylase 2 (beta)                                                    |
| <b>Ncam1</b>        | -1,26 | <b>0,01984</b> | 10917183 | BC101924                       | neural cell adhesion molecule 1                                                                    |
| <b>H2afx</b>        | -1,26 | <b>0,00262</b> | 10909480 |                                | H2A histone family, member X                                                                       |
| <b>Syt15</b>        | -1,26 | <b>0,02256</b> | 10786957 | BC084685                       | synaptotagmin XV                                                                                   |
|                     | -1,26 | <b>0,04970</b> | 10887040 |                                |                                                                                                    |
| <b>Praf2</b>        | -1,26 | <b>0,03522</b> | 10937060 |                                | PRA1 domain family, member 2                                                                       |
| <b>Brpf3</b>        | -1,26 | <b>0,00776</b> | 10828791 |                                | bromodomain and PHD finger containing, 3                                                           |
| <b>Slc22a17 Efs</b> | -1,25 | <b>0,01658</b> | 10783669 | AB040056 B<br>C161942          | solute carrier family 22, member 17   embryonal Fyn-associated substrate                           |
|                     | -1,25 | <b>0,03689</b> | 10874048 |                                |                                                                                                    |
| <b>Dhrs7b</b>       | -1,25 | <b>0,01134</b> | 10734190 | BC086453                       | dehydrogenase/reductase (SDR family) member 7B                                                     |
| <b>RGD1311249</b>   | -1,25 | <b>0,01454</b> | 10876281 | BC087107                       | similar to RIKEN cDNA B230312A22                                                                   |
| <b>Gys1</b>         | -1,25 | <b>0,04707</b> | 10706820 | BC131849                       | glycogen synthase 1, muscle                                                                        |
|                     | -1,25 | <b>0,00187</b> | 10842193 | BC105769                       |                                                                                                    |
|                     | -1,25 | <b>0,00200</b> | 10736415 |                                |                                                                                                    |
|                     | -1,25 | <b>0,01073</b> | 10836249 |                                |                                                                                                    |
| <b>Slc24a6</b>      | -1,25 | <b>0,00134</b> | 10762304 | BC079350                       | solute carrier family 24 (sodium/potassium/calcium exchanger), member 6                            |
| <b>Syt11</b>        | -1,25 | <b>0,04753</b> | 10824349 | AF000423                       | synaptotagmin XI                                                                                   |
| <b>Pom121</b>       | -1,25 | <b>0,00944</b> | 10757674 |                                | nuclear pore membrane protein 121                                                                  |

|                   |              |                |          |          |                                                                                |
|-------------------|--------------|----------------|----------|----------|--------------------------------------------------------------------------------|
| <b>Chrn2</b>      | <b>-1,25</b> | <b>0,00941</b> | 10824517 | L31622   | cholinergic receptor, nicotinic, beta 2 (neuronal)                             |
| <b>Slc7a4</b>     | <b>-1,25</b> | <b>0,00555</b> | 10752433 | BC169079 | solute carrier family 7 (cationic amino acid transporter, y+ system), member 4 |
| <b>Ralgds</b>     | <b>-1,25</b> | <b>0,02090</b> | 10834817 | L07925   | ral guanine nucleotide dissociation stimulator                                 |
| <b>Midn</b>       | <b>-1,25</b> | <b>0,03337</b> | 10900592 |          | midnolin                                                                       |
| <b>Pim3</b>       | <b>-1,25</b> | <b>0,00922</b> | 10898474 | AF086624 | pim-3 oncogene                                                                 |
| <b>Pcbp4</b>      | <b>-1,25</b> | <b>0,00678</b> | 10912849 |          | poly(rC) binding protein 4                                                     |
| <b>RGD1307966</b> | <b>-1,25</b> | <b>0,00781</b> | 10747847 |          | similar to hypothetical protein                                                |
| <b>Pex6</b>       | <b>-1,25</b> | <b>0,01633</b> | 10921677 | D63673   | peroxisomal biogenesis factor 6                                                |
| <b>Tbx2</b>       | <b>-1,25</b> | <b>0,01995</b> | 10737107 |          | T-box 2                                                                        |
|                   | <b>-1,25</b> | <b>0,02018</b> | 10866408 |          |                                                                                |
| <b>Ergic3</b>     | <b>-1,25</b> | <b>0,00595</b> | 10841452 |          | ERGIC and golgi 3                                                              |
| <b>Ndufb7</b>     | <b>-1,25</b> | <b>0,03226</b> | 10810299 |          | NADH dehydrogenase (ubiquinone) 1 beta subcomplex, 7                           |
| <b>Prkce</b>      | <b>-1,25</b> | <b>0,00909</b> | 10882709 | AY642593 | protein kinase C, epsilon                                                      |
| <b>Syde1</b>      | <b>-1,25</b> | <b>0,00457</b> | 10894150 |          | synapse defective 1, Rho GTPase, homolog 1 (C. elegans)                        |
|                   | <b>-1,25</b> | <b>0,00531</b> | 10927051 |          |                                                                                |
| <b>Pcdh17</b>     | <b>-1,25</b> | <b>0,01475</b> | 10781745 |          | protocadherin 17                                                               |
| <b>Srebf2</b>     | <b>-1,25</b> | <b>0,00192</b> | 10898091 | BC101902 | sterol regulatory element binding transcription factor 2                       |
| <b>Cbx4</b>       | <b>-1,25</b> | <b>0,00047</b> | 10931644 |          | chromobox homolog 4 (Pc class homolog, Drosophila)                             |
| <b>Egfl7</b>      | <b>-1,25</b> | <b>0,00008</b> | 10834447 | AF223678 | EGF-like-domain, multiple 7                                                    |

#### Up-regulated genes

| Gene                    | Fold change | p value | Affymetrix Cluster Id | Genebank | Description                                                    |
|-------------------------|-------------|---------|-----------------------|----------|----------------------------------------------------------------|
|                         | 2,53        | 0,04082 | 10915239              |          |                                                                |
| <b>Dpp4</b>             | 2,36        | 0,02772 | 10845647              | J04591   | dipeptidylpeptidase 4                                          |
| <b>Gpm6a</b>            | 2,16        | 0,03081 | 10791552              | BC088862 | glycoprotein m6a                                               |
| <b>Mst4</b>             | 2,04        | 0,00850 | 10935418              |          | serine/threonine protein kinase MST4                           |
| <b>Slc26a3</b>          | 2,03        | 0,01657 | 10884118              | AF337809 | solute carrier family 26, member 3                             |
| <b>Cmah</b>             | 1,95        | 0,01695 | 10798420              | BC095843 | cytidine monophosphate-N-acetylneuraminic acid hydroxylase     |
| <b>Sbsn</b>             | 1,92        | 0,04683 | 10706059              | BC107924 | suprabasin                                                     |
| <b>LOC690930</b>        | 1,90        | 0,01230 | 10728930              |          | similar to membrane-spanning 4-domains, subfamily A, member 6B |
|                         | 1,88        | 0,00304 | 10877753              | BC089062 |                                                                |
| <b>Dsp</b>              | 1,81        | 0,04772 | 10797966              |          | desmoplakin                                                    |
| <b>Upk1b RGD1306995</b> | 1,80        | 0,04622 | 10751239              | BC093613 | uroplakin 1B   similar to hypothetical protein FLJ32859        |
|                         | 1,80        | 0,00014 | 10934982              |          |                                                                |
| <b>Isl1</b>             | 1,77        | 0,02667 | 10821486              | AY557632 | ISL LIM homeobox 1                                             |
|                         | 1,74        | 0,01690 | 10724580              |          |                                                                |
|                         | 1,71        | 0,00229 | 10797013              |          |                                                                |
| <b>Pon3</b>             | 1,71        | 0,02631 | 10860878              | BC079466 | paraoxonase 3                                                  |
| <b>Scel</b>             | 1,71        | 0,03495 | 10781890              | BC159429 | sciellin                                                       |
|                         | 1,71        | 0,00234 | 10932228              |          |                                                                |
|                         | 1,70        | 0,04172 | 10918833              |          |                                                                |
| <b>Cxadr</b>            | 1,70        | 0,02430 | 10749983              | BC088313 | coxsackie virus and adenovirus receptor                        |

|                   |      |         |          |          |                                                               |
|-------------------|------|---------|----------|----------|---------------------------------------------------------------|
| <b>Fgg</b>        | 1,69 | 0,03824 | 10816067 | BC078893 | fibrinogen gamma chain                                        |
|                   | 1,69 | 0,00015 | 10772638 |          |                                                               |
| <b>RGD1562462</b> | 1,67 | 0,00016 | 10770109 |          | similar to Ifi204 protein                                     |
|                   | 1,65 | 0,00156 | 10802189 |          |                                                               |
| <b>LOC361346</b>  | 1,63 | 0,01180 | 10805100 | BC082051 | similar to chromosome 18 open reading frame 54                |
|                   | 1,61 | 0,00061 | 10802541 |          |                                                               |
| <b>RGD1563835</b> | 1,60 | 0,00007 | 10751237 |          | similar to ribosomal protein L27                              |
|                   | 1,59 | 0,00129 | 10858497 |          |                                                               |
|                   | 1,58 | 0,00809 | 10845070 |          |                                                               |
| <b>Bcl6</b>       | 1,58 | 0,00272 | 10751931 | BC166425 | B-cell CLL/lymphoma 6                                         |
| <b>Cyp2b2</b>     | 1,58 | 0,01486 | 10705230 | M34452   | cytochrome P450, family 2, subfamily b, polypeptide 2         |
|                   | 1,58 | 0,01756 | 10932310 |          |                                                               |
| <b>Lrrc1</b>      | 1,56 | 0,02945 | 10918791 | BC079423 | leucine rich repeat containing 1                              |
|                   | 1,56 | 0,01173 | 10924172 |          |                                                               |
|                   | 1,56 | 0,03379 | 10930588 | K00160   |                                                               |
|                   | 1,56 | 0,01288 | 10838282 |          |                                                               |
|                   | 1,55 | 0,00318 | 10926095 |          |                                                               |
|                   | 1,54 | 0,00022 | 10813353 |          |                                                               |
| <b>Lvrn</b>       | 1,52 | 0,04120 | 10801557 |          | laeverin                                                      |
| <b>MGC108823</b>  | 1,52 | 0,02928 | 10801975 | BC089836 | similar to interferon-inducible GTPase                        |
| <b>RGD1564400</b> | 1,51 | 0,00003 | 10836556 |          | similar to Eukaryotic translation initiation factor 5 (eIF-5) |
|                   | 1,51 | 0,00059 | 10936475 |          |                                                               |
| <b>Samd9l</b>     | 1,49 | 0,00559 | 10860806 |          | sterile alpha motif domain containing 9-like                  |
| <b>Samd9l</b>     | 1,49 | 0,00564 | 10860809 |          | sterile alpha motif domain containing 9-like                  |
| <b>Samd9l</b>     | 1,49 | 0,00565 | 10860812 |          | sterile alpha motif domain containing 9-like                  |
|                   | 1,49 | 0,00429 | 10739223 |          |                                                               |
|                   | 1,49 | 0,00164 | 10744937 |          |                                                               |
| <b>Gata5</b>      | 1,49 | 0,02284 | 10852378 | BC085855 | GATA binding protein 5                                        |
| <b>LOC683302</b>  | 1,47 | 0,00002 | 10787048 |          | similar to tumor protein, translationally-controlled 1        |
|                   | 1,47 | 0,00015 | 10897891 |          |                                                               |
|                   | 1,47 | 0,02787 | 10708589 |          |                                                               |
|                   | 1,47 | 0,00057 | 10730472 |          |                                                               |
| <b>RGD1564552</b> | 1,47 | 0,00069 | 10799888 |          | similar to ribosomal protein L21                              |
|                   | 1,46 | 0,00055 | 10728028 | BC090353 |                                                               |
| <b>Ddx3x</b>      | 1,46 | 0,00082 | 10936753 | BC085914 | DEAD (Asp-Glu-Ala-Asp) box polypeptide 3, X-linked            |
| <b>LOC500625</b>  | 1,45 | 0,00221 | 10883443 |          |                                                               |
|                   | 1,45 | 0,00059 | 10905770 |          |                                                               |
| <b>Samd9l</b>     | 1,45 | 0,00637 | 10860815 | BC098747 | sterile alpha motif domain containing 9-like                  |
| <b>Cir1</b>       | 1,44 | 0,00001 | 10796921 | BC085869 | corepressor interacting with RBPI, 1                          |
|                   | 1,44 | 0,00007 | 10868302 | AY539927 |                                                               |
|                   | 1,44 | 0,00125 | 10715250 |          |                                                               |
| <b>Gal3st2</b>    | 1,44 | 0,03251 | 10925678 |          | galactose-3-O-sulfotransferase 2                              |
|                   | 1,43 | 0,00028 | 10853149 |          |                                                               |
|                   | 1,43 | 0,00066 | 10721218 |          |                                                               |

|                                                  |      |         |          |          |                                                                                        |
|--------------------------------------------------|------|---------|----------|----------|----------------------------------------------------------------------------------------|
|                                                  | 1,43 | 0,00002 | 10843207 |          |                                                                                        |
|                                                  | 1,43 | 0,00041 | 10853681 |          |                                                                                        |
|                                                  | 1,42 | 0,03298 | 10802710 |          |                                                                                        |
|                                                  | 1,42 | 0,00249 | 10772861 |          |                                                                                        |
| <b>Rgs2</b>                                      | 1,42 | 0,00766 | 10768332 | AY043246 | regulator of G-protein signaling 2                                                     |
| ...                                              | 1,41 | 0,03643 | 10749975 |          |                                                                                        |
| <b>Herc6</b>                                     | 1,41 | 0,00275 | 10862765 | BC085921 | hect domain and RLD 6                                                                  |
|                                                  | 1,41 | 0,00002 | 10911925 |          |                                                                                        |
| <b>Egln1</b>                                     | 1,41 | 0,00162 | 10724578 | AY228140 | EGL nine homolog 1 (C. elegans)                                                        |
|                                                  | 1,40 | 0,00226 | 10761253 |          |                                                                                        |
|                                                  | 1,40 | 0,00156 | 10903522 |          |                                                                                        |
|                                                  | 1,40 | 0,00173 | 10895391 |          |                                                                                        |
|                                                  | 1,40 | 0,02737 | 10859195 |          |                                                                                        |
| <b>Tbc1d22a</b><br><b> RGD156</b><br><b>0617</b> | 1,39 | 0,00150 | 10898444 | AF062594 | TBC1 domain family, member 22a   hypothetical gene supported by NM_053561;<br>AF062594 |
|                                                  | 1,39 | 0,00080 | 10906590 |          |                                                                                        |
|                                                  | 1,39 | 0,00651 | 10910770 |          |                                                                                        |
|                                                  | 1,39 | 0,00089 | 10742962 |          |                                                                                        |
|                                                  | 1,39 | 0,00525 | 10852671 |          |                                                                                        |
|                                                  | 1,39 | 0,00959 | 10796230 |          |                                                                                        |
| <b>LOC6813</b><br><b>38</b>                      | 1,39 | 0,00119 | 10928032 |          | similar to ribosomal protein L31                                                       |
|                                                  | 1,39 | 0,00154 | 10785473 |          |                                                                                        |
| <b>Spock2</b>                                    | 1,39 | 0,01691 | 10829965 |          | sparc/osteonectin, cwcv and kazal-like domains proteoglycan 2                          |
| <b>Cobl</b>                                      | 1,38 | 0,03544 | 10778525 |          | cordons-bleu homolog (mouse)                                                           |
|                                                  | 1,38 | 0,00123 | 10918865 |          |                                                                                        |
|                                                  | 1,38 | 0,00019 | 10926819 |          |                                                                                        |
|                                                  | 1,38 | 0,00302 | 10813885 |          |                                                                                        |
|                                                  | 1,38 | 0,00712 | 10768303 |          |                                                                                        |
|                                                  | 1,37 | 0,00142 | 10792331 |          |                                                                                        |
|                                                  | 1,37 | 0,01419 | 10765036 |          |                                                                                        |
|                                                  | 1,37 | 0,00431 | 10859117 |          |                                                                                        |
| <b>RGD1561</b><br><b>086</b>                     | 1,37 | 0,00085 | 10934113 |          | similar to ribosomal protein L34                                                       |
| <b>LOC1003</b><br><b>61110</b>                   | 1,36 | 0,00615 | 10917992 |          | histone H3.3B-like                                                                     |
| <b>Nphs1</b>                                     | 1,36 | 0,01611 | 10705892 | AF161715 | nephrosis 1 homolog (human)                                                            |
|                                                  | 1,36 | 0,02866 | 10751789 |          |                                                                                        |
|                                                  | 1,36 | 0,00295 | 10810278 |          |                                                                                        |
|                                                  | 1,36 | 0,00133 | 10836015 |          |                                                                                        |
|                                                  | 1,36 | 0,01071 | 10723464 |          |                                                                                        |
|                                                  | 1,36 | 0,02950 | 10772272 |          |                                                                                        |
|                                                  | 1,36 | 0,03501 | 10767044 |          |                                                                                        |
| <b>Ezr</b>                                       | 1,36 | 0,02138 | 10717891 | BC081958 | ezrin                                                                                  |
| <b>LOC3042</b><br><b>39</b>                      | 1,36 | 0,04208 | 10756334 | BC166500 | similar to RalA binding protein 1                                                      |
| <b>RGD1565</b><br><b>170</b>                     | 1,36 | 0,00002 | 10780763 |          | similar to 60S ribosomal protein L23a                                                  |
| <b>C1galt1</b>                                   | 1,36 | 0,00279 | 10853691 | AF157963 | core 1 synthase, glycoprotein-N-acetylgalactosamine 3-beta-galactosyltransferase, 1    |

|                     |      |         |          |                       |                                                                                         |
|---------------------|------|---------|----------|-----------------------|-----------------------------------------------------------------------------------------|
| <b>Tlr7</b>         | 1,35 | 0,02577 | 10933345 | EF032637              | toll-like receptor 7                                                                    |
|                     | 1,35 | 0,00026 | 10890535 | M19635                |                                                                                         |
| <b>LOC684806</b>    | 1,35 | 0,00052 | 10781564 |                       | similar to 40S ribosomal protein S29                                                    |
| <b>Giot1 Zfp347</b> | 1,35 | 0,00068 | 10900841 | AB047636 A<br>B047637 | gonadotropin inducible ovarian transcription factor 1   zinc finger protein 347         |
|                     | 1,35 | 0,00128 | 10890297 |                       |                                                                                         |
|                     | 1,35 | 0,00214 | 10889421 |                       |                                                                                         |
|                     | 1,34 | 0,03294 | 10807793 |                       |                                                                                         |
|                     | 1,34 | 0,00715 | 10754114 |                       |                                                                                         |
|                     | 1,34 | 0,00307 | 10838352 |                       |                                                                                         |
|                     | 1,34 | 0,00489 | 10755670 |                       |                                                                                         |
|                     | 1,34 | 0,00011 | 10768301 |                       |                                                                                         |
|                     | 1,34 | 0,00381 | 10785895 |                       |                                                                                         |
|                     | 1,33 | 0,01627 | 10713604 |                       |                                                                                         |
|                     | 1,33 | 0,02376 | 10930569 | BC166549              |                                                                                         |
|                     | 1,33 | 0,00041 | 10918653 |                       |                                                                                         |
| <b>RGD1561736</b>   | 1,33 | 0,00162 | 10836017 |                       | similar to ribosomal protein L10                                                        |
| <b>Cnot7</b>        | 1,33 | 0,00280 | 10787209 | BC167766              | CCR4-NOT transcription complex, subunit 7                                               |
| <b>Gtf2a2</b>       | 1,33 | 0,00416 | 10911309 | BC168727              | general transcription factor IIA, 2                                                     |
| <b>Tp53inp1</b>     | 1,33 | 0,00358 | 10867609 | AB107917              | tumor protein p53 inducible nuclear protein 1                                           |
| <b>Tbpl1</b>        | 1,33 | 0,00204 | 10702309 |                       | TATA box binding protein-like 1                                                         |
|                     | 1,33 | 0,00106 | 10803671 |                       |                                                                                         |
| <b>RGD1310507</b>   | 1,33 | 0,03873 | 10919658 |                       | similar to RIKEN cDNA 1300017J02                                                        |
| <b>Rhpn2</b>        | 1,33 | 0,04850 | 10706146 |                       | rhophilin, Rho GTPase binding protein 2                                                 |
|                     | 1,33 | 0,00609 | 10900122 |                       |                                                                                         |
|                     | 1,33 | 0,00098 | 10923938 |                       |                                                                                         |
| <b>LOC100362277</b> | 1,33 | 0,00051 | 10808893 |                       | 60S ribosomal protein L29-like                                                          |
| <b>RGD1560471</b>   | 1,33 | 0,00012 | 10804693 | BC168236              | similar to hypothetical protein 4933429F08                                              |
| <b>Chordc1</b>      | 1,33 | 0,00018 | 10908133 |                       | cysteine and histidine-rich domain (CHORD)-containing 1                                 |
|                     | 1,32 | 0,00008 | 10802381 |                       |                                                                                         |
| <b>MGC109340</b>    | 1,32 | 0,02350 | 10935031 | BC092634              | similar to Microsomal signal peptidase 23 kDa subunit (SPase 22 kDa subunit) (SPC22/23) |
|                     | 1,32 | 0,00175 | 10859627 |                       |                                                                                         |
|                     | 1,32 | 0,03333 | 10926089 |                       |                                                                                         |
|                     | 1,32 | 0,00004 | 10731222 |                       |                                                                                         |
|                     | 1,32 | 0,00687 | 10840657 |                       |                                                                                         |
|                     | 1,32 | 0,00054 | 10813246 |                       |                                                                                         |
| <b>Ube2v2</b>       | 1,32 | 0,00230 | 10752621 | BC087593              | ubiquitin-conjugating enzyme E2 variant 2                                               |
|                     | 1,32 | 0,00002 | 10752061 |                       |                                                                                         |
|                     | 1,32 | 0,01579 | 10877667 |                       |                                                                                         |
|                     | 1,32 | 0,00185 | 10787722 |                       |                                                                                         |
|                     | 1,32 | 0,00215 | 10787782 | BC099122              |                                                                                         |
|                     | 1,32 | 0,02256 | 10870488 |                       |                                                                                         |
|                     | 1,31 | 0,00101 | 10739167 |                       |                                                                                         |
| <b>Mospd1</b>       | 1,31 | 0,00331 | 10939816 | BC086521              | motile sperm domain containing 1                                                        |
| <b>Cgn</b>          | 1,31 | 0,01715 | 10824860 |                       | cingulin                                                                                |



|                   |      |         |          |          |                                                                            |
|-------------------|------|---------|----------|----------|----------------------------------------------------------------------------|
|                   | 1,31 | 0,00216 | 10863570 |          |                                                                            |
| <b>Sugt1</b>      | 1,31 | 0,00353 | 10781699 | BC158724 | SGT1, suppressor of G2 allele of SKP1 ( <i>S. cerevisiae</i> )             |
|                   | 1,31 | 0,01642 | 10774625 |          |                                                                            |
|                   | 1,31 | 0,03036 | 10824788 |          |                                                                            |
| <b>Clk4</b>       | 1,31 | 0,00424 | 10733321 | BC079006 | CDC like kinase 4                                                          |
| <b>Orc4l</b>      | 1,31 | 0,00587 | 10845095 | BC060516 | origin recognition complex, subunit 4-like (yeast)                         |
|                   | 1,31 | 0,00417 | 10930564 |          |                                                                            |
| <b>Mospd1</b>     | 1,31 | 0,00320 | 10778399 | BC086521 | motile sperm domain containing 1                                           |
| <b>Tmsb4x</b>     | 1,31 | 0,00079 | 10876291 | M34043   | thymosin beta 4, X-linked                                                  |
| <b>Znf654</b>     | 1,31 | 0,00513 | 10752654 |          | zinc finger protein 654                                                    |
|                   | 1,30 | 0,01466 | 10933038 |          |                                                                            |
| <b>LOC679469</b>  | 1,30 | 0,00119 | 10786359 |          | similar to retinoblastoma-associated protein 140                           |
|                   | 1,30 | 0,00180 | 10860325 |          |                                                                            |
| <b>Tc2n</b>       | 1,30 | 0,01840 | 10891765 | BC088432 | tandem C2 domains, nuclear                                                 |
| <b>RGD1561736</b> | 1,30 | 0,00375 | 10940411 |          | similar to ribosomal protein L10                                           |
|                   | 1,30 | 0,02798 | 10804402 |          |                                                                            |
| <b>Morf4l2</b>    | 1,30 | 0,00175 | 10939444 | BC083606 | mortality factor 4 like 2                                                  |
| <b>N5</b>         | 1,30 | 0,00834 | 10861560 | L31882   |                                                                            |
| <b>RGD1565054</b> | 1,30 | 0,00040 | 10938483 |          | similar to 60S acidic ribosomal protein P1                                 |
|                   | 1,30 | 0,00007 | 10741861 |          |                                                                            |
| <b>Set Pkn3</b>   | 1,30 | 0,00128 | 10749869 | BC158573 | SET nuclear oncogene   protein kinase N3                                   |
| <b>Adamts19</b>   | 1,30 | 0,00015 | 10801960 |          | ADAM metalloproteinase with thrombospondin type 1 motif, 19                |
| <b>Fam96a</b>     | 1,30 | 0,01556 | 10911042 | BC086524 | family with sequence similarity 96, member A                               |
|                   | 1,30 | 0,00407 | 10718421 |          |                                                                            |
| <b>Ifi204</b>     | 1,30 | 0,01471 | 10770082 | BC085891 | interferon activated gene 204                                              |
|                   | 1,30 | 0,00281 | 10860184 |          |                                                                            |
|                   | 1,29 | 0,00072 | 10899428 | BC063811 |                                                                            |
| <b>Sult1d1</b>    | 1,29 | 0,03365 | 10771919 | U32372   | sulfotransferase family 1D, member 1                                       |
|                   | 1,29 | 0,00049 | 10804560 |          |                                                                            |
| <b>Nampt</b>      | 1,29 | 0,02055 | 10884162 | AB081730 | nicotinamide phosphoribosyltransferase                                     |
|                   | 1,29 | 0,01599 | 10742386 |          |                                                                            |
| <b>RGD1566035</b> | 1,29 | 0,00014 | 10936278 |          | similar to protein tyrosine phosphatase 4a1                                |
| <b>Erp44</b>      | 1,29 | 0,00093 | 10876675 | AY158662 | endoplasmic reticulum protein 44                                           |
|                   | 1,29 | 0,00340 | 10884046 |          |                                                                            |
|                   | 1,29 | 0,00491 | 10726672 |          |                                                                            |
| <b>Ttc35</b>      | 1,29 | 0,00000 | 10896380 | BC158805 | tetratricopeptide repeat domain 35                                         |
| <b>H3f3b</b>      | 1,29 | 0,02752 | 10749070 | BC063159 | H3 histone, family 3B                                                      |
| <b>Sf3b1</b>      | 1,29 | 0,00281 | 10928122 |          | splicing factor 3b, subunit 1                                              |
|                   | 1,29 | 0,01620 | 10852392 |          |                                                                            |
|                   | 1,29 | 0,00232 | 10800832 |          |                                                                            |
| <b>Npm1</b>       | 1,29 | 0,00650 | 10741907 | J04943   | nucleophosmin (nucleolar phosphoprotein B23, numatrin)                     |
| <b>RGD1304929</b> | 1,29 | 0,00226 | 10781482 |          | similar to chromosome 13 open reading frame 18                             |
| <b>Tipr1</b>      | 1,29 | 0,00005 | 10769509 | BC128780 | TIP41, TOR signaling pathway regulator-like ( <i>S. cerevisiae</i> )       |
| <b>Slc28a2</b>    | 1,29 | 0,00650 | 10849279 | AY029302 | solute carrier family 28 (sodium-coupled nucleoside transporter), member 2 |

|                             |      |         |          |          |                                                                          |
|-----------------------------|------|---------|----------|----------|--------------------------------------------------------------------------|
| <b>Ntn1 RG<br/>D1564148</b> | 1,29 | 0,03096 | 10743781 |          | netrin 1   similar to microfibrillar-associated protein 1                |
|                             | 1,29 | 0,00405 | 10760068 | BC091375 |                                                                          |
| <b>RGD1562<br/>952</b>      | 1,28 | 0,00087 | 10812779 |          | similar to ErbB2 interacting protein isoform 2                           |
| <b>LOC2924<br/>49</b>       | 1,28 | 0,01029 | 10701663 | AY389467 | similar to hypothetical protein                                          |
|                             | 1,28 | 0,00629 | 10743855 |          |                                                                          |
|                             | 1,28 | 0,00248 | 10772758 |          |                                                                          |
|                             | 1,28 | 0,00064 | 10905605 |          |                                                                          |
| <b>Tomm70a</b>              | 1,28 | 0,00071 | 10884211 | BC098640 | translocase of outer mitochondrial membrane 70 homolog A (S. cerevisiae) |
|                             | 1,28 | 0,00041 | 10801535 |          |                                                                          |
|                             | 1,28 | 0,00405 | 10784219 |          |                                                                          |
| <b>Cul4b</b>                | 1,28 | 0,00340 | 10931893 |          | cullin 4B                                                                |
|                             | 1,28 | 0,01807 | 10881474 | BC168232 |                                                                          |
| <b>Rex2</b>                 | 1,28 | 0,00281 | 10873880 | BC168232 | reduced expression 2                                                     |
|                             | 1,28 | 0,01021 | 10826604 |          |                                                                          |
| <b>Matr3</b>                | 1,28 | 0,01313 | 10781787 | AB205483 | matrin 3                                                                 |
|                             | 1,28 | 0,00960 | 10775624 |          |                                                                          |
|                             | 1,28 | 0,04548 | 10845645 |          |                                                                          |
| <b>Krt7</b>                 | 1,28 | 0,03367 | 10899405 |          | keratin 7                                                                |
|                             | 1,28 | 0,00050 | 10807872 |          |                                                                          |
|                             | 1,28 | 0,00604 | 10727600 |          |                                                                          |
| <b>RGD1564<br/>843</b>      | 1,28 | 0,00005 | 10875815 |          | similar to hypothetical protein 4930474N05                               |
| <b>Psmc6</b>                | 1,28 | 0,00179 | 10779607 |          | proteasome (prosome, macropain) 26S subunit, ATPase, 6                   |
| <b>LOC6906<br/>62</b>       | 1,28 | 0,00159 | 10808010 |          | similar to 60S ribosomal protein L29 (P23)                               |
| <b>Eri1</b>                 | 1,28 | 0,00358 | 10788497 | BC089828 | exoribonuclease 1                                                        |
| <b>RGD1309<br/>095</b>      | 1,28 | 0,01100 | 10927712 |          | similar to hypothetical protein BC015148                                 |
|                             | 1,28 | 0,00003 | 10702187 |          |                                                                          |
|                             | 1,28 | 0,00011 | 10751799 |          |                                                                          |
| <b>Clic2</b>                | 1,27 | 0,00029 | 10827592 | BC088182 | chloride intracellular channel 2                                         |
| <b>Sp1</b>                  | 1,27 | 0,00338 | 10899552 | AY305388 |                                                                          |
|                             | 1,27 | 0,00315 | 10791820 |          |                                                                          |
|                             | 1,27 | 0,01336 | 10793838 |          |                                                                          |
|                             | 1,27 | 0,03050 | 10804301 |          |                                                                          |
| <b>Enc1</b>                 | 1,27 | 0,02941 | 10812689 | AY669396 | ectodermal-neural cortex 1                                               |
|                             | 1,27 | 0,01347 | 10812881 |          |                                                                          |
| <b>Rpe</b>                  | 1,27 | 0,00157 | 10924076 | BC101869 | ribulose-5-phosphate-3-epimerase                                         |
| <b>RGD7351<br/>40</b>       | 1,27 | 0,00506 | 10850140 |          | hypothetical protein LK44                                                |
|                             | 1,27 | 0,00766 | 10850440 |          |                                                                          |
| <b>LOC6900<br/>96</b>       | 1,27 | 0,00406 | 10774432 |          | similar to ribosomal protein L28                                         |
|                             | 1,27 | 0,01781 | 10909614 |          |                                                                          |
| <b>Shroom2</b>              | 1,27 | 0,01424 | 10937601 | BC085701 | shroom family member 2                                                   |
|                             | 1,27 | 0,00650 | 10867361 |          |                                                                          |
|                             | 1,27 | 0,03290 | 10714830 |          |                                                                          |
| <b>RGD1563<br/>157</b>      | 1,27 | 0,00001 | 10883799 |          | similar to 60S ribosomal protein L35                                     |

|                                          |      |         |          |                   |                                                                                                                                                                               |
|------------------------------------------|------|---------|----------|-------------------|-------------------------------------------------------------------------------------------------------------------------------------------------------------------------------|
| <b>LOC680027</b>                         | 1,27 | 0,00212 | 10882523 |                   | similar to suppressor of initiator codon mutations, related sequence 1                                                                                                        |
| <b>Eif3e</b>                             | 1,27 | 0,01516 | 10903545 | BC082087          | eukaryotic translation initiation factor 3, subunit E                                                                                                                         |
| <b>LOC686066</b>                         | 1,27 | 0,00114 | 10844181 |                   | similar to 60S ribosomal protein L38                                                                                                                                          |
|                                          | 1,27 | 0,01247 | 10811008 |                   |                                                                                                                                                                               |
|                                          | 1,27 | 0,00025 | 10877067 |                   |                                                                                                                                                                               |
|                                          | 1,26 | 0,01000 | 10903674 |                   |                                                                                                                                                                               |
| <b>RGD1311863</b>                        | 1,26 | 0,01358 | 10714264 | BC091268          | similar to RIKEN cDNA 2410127L17                                                                                                                                              |
| <b>tGap1 LOC304239 LOC688241</b>         | 1,26 | 0,00128 | 10843142 | AY631396 BC166500 | GTPase activating protein testicular GAP1   similar to RalA binding protein 1   similar to GTPase activating protein testicular GAP1                                          |
|                                          | 1,26 | 0,03567 | 10840653 | BC166814          |                                                                                                                                                                               |
| <b>Stag2</b>                             | 1,26 | 0,00597 | 10936163 |                   | stromal antigen 2                                                                                                                                                             |
|                                          | 1,26 | 0,01605 | 10737647 |                   |                                                                                                                                                                               |
| <b>Tprkb</b>                             | 1,26 | 0,00280 | 10856914 | BC087060          | Tp53rk binding protein                                                                                                                                                        |
|                                          | 1,26 | 0,00013 | 10830972 |                   |                                                                                                                                                                               |
| <b>Il22ra1</b>                           | 1,26 | 0,03193 | 10872876 |                   | interleukin 22 receptor, alpha 1                                                                                                                                              |
|                                          | 1,26 | 0,01872 | 10710152 |                   |                                                                                                                                                                               |
| <b>Spopl</b>                             | 1,26 | 0,01729 | 10843172 | BC167106          | speckle-type POZ protein-like                                                                                                                                                 |
|                                          | 1,26 | 0,01109 | 10788345 |                   |                                                                                                                                                                               |
| <b>Zbp1</b>                              | 1,26 | 0,01752 | 10852136 | AJ302054          | Z-DNA binding protein 1                                                                                                                                                       |
| <b>Ndufb4-ps1</b>                        | 1,26 | 0,02476 | 10906544 |                   | NADH dehydrogenase (ubiquinone) 1 beta subcomplex 4, pseudogene 1                                                                                                             |
|                                          | 1,26 | 0,00313 | 10769693 |                   |                                                                                                                                                                               |
|                                          | 1,26 | 0,00318 | 10772726 |                   |                                                                                                                                                                               |
|                                          | 1,26 | 0,00019 | 10818134 |                   |                                                                                                                                                                               |
| <b>Dcun1d5</b>                           | 1,26 | 0,02981 | 10907849 | BC087627          | DCN1, defective in cullin neddylation 1, domain containing 5 ( <i>S. cerevisiae</i> )                                                                                         |
| <b>Slc25a32</b>                          | 1,26 | 0,02340 | 10903482 | BC166530          | solute carrier family 25, member 32                                                                                                                                           |
| <b>Yme1l1</b>                            | 1,26 | 0,00131 | 10796800 | BC081751          | YME1-like 1 ( <i>S. cerevisiae</i> )                                                                                                                                          |
|                                          | 1,26 | 0,00485 | 10850519 |                   |                                                                                                                                                                               |
| <b>Gnl3</b>                              | 1,26 | 0,00665 | 10790002 | BC093602          | guanine nucleotide binding protein-like 3 (nucleolar)                                                                                                                         |
|                                          | 1,26 | 0,00302 | 10939178 |                   |                                                                                                                                                                               |
| <b>Tpd52l3</b>                           | 1,26 | 0,01880 | 10714754 |                   | tumor protein D52-like 3                                                                                                                                                      |
| <b>Hmgb1 Hmg1l1 RGD1562312 LOC678705</b> | 1,26 | 0,00295 | 10763430 | AF275734 BC168143 | high mobility group box 1   high-mobility group (nonhistone chromosomal) protein 1-like 1   similar to High mobility group protein 1 (HMG-1)   hypothetical protein LOC678705 |
|                                          | 1,26 | 0,03708 | 10896964 |                   |                                                                                                                                                                               |
| <b>Snx6</b>                              | 1,26 | 0,00378 | 10889944 | BC168856          | sorting nexin 6                                                                                                                                                               |
|                                          | 1,26 | 0,02735 | 10778080 |                   |                                                                                                                                                                               |
|                                          | 1,26 | 0,00079 | 10940003 |                   |                                                                                                                                                                               |
|                                          | 1,26 | 0,00530 | 10714053 |                   |                                                                                                                                                                               |
| <b>Paip2l1</b>                           | 1,25 | 0,00027 | 10710769 | BC079261          | polyadenylate-binding protein-interacting protein 2-like 1                                                                                                                    |
|                                          | 1,25 | 0,00376 | 10881468 | BC168232          |                                                                                                                                                                               |
| <b>Psm3 Psm3l</b>                        | 1,25 | 0,00638 | 10885045 | BC081817 M58593   | proteasome (prosome, macropain) subunit, alpha type 3   proteasome subunit alpha type 3-like                                                                                  |
| <b>LOC498750</b>                         | 1,25 | 0,00253 | 10798386 | BC089212 BC085940 | similar to cDNA sequence BC005537                                                                                                                                             |
| <b>Trnt1</b>                             | 1,25 | 0,00984 | 10857538 | BC095841          | tRNA nucleotidyl transferase, CCA-adding, 1                                                                                                                                   |

|                        |      |         |          |          |                                                                                   |
|------------------------|------|---------|----------|----------|-----------------------------------------------------------------------------------|
|                        | 1,25 | 0,00863 | 10927699 |          |                                                                                   |
| <b>Mphosph 10</b>      | 1,25 | 0,03530 | 10722566 | BC161909 | M-phase phosphoprotein 10 (U3 small nucleolar ribonucleoprotein)                  |
|                        | 1,25 | 0,00157 | 10851813 |          |                                                                                   |
| <b>Son</b>             | 1,25 | 0,01993 | 10875322 |          |                                                                                   |
| ⋮                      | 1,25 | 0,01687 | 10939899 |          |                                                                                   |
|                        | 1,25 | 0,00338 | 10921268 |          |                                                                                   |
|                        | 1,25 | 0,02889 | 10833416 |          |                                                                                   |
| <b>Fmo1</b>            | 1,25 | 0,00437 | 10769361 | M84719   | flavin containing monooxygenase 1                                                 |
| <b>Dhx15</b>           | 1,25 | 0,00299 | 10772967 |          | DEAH (Asp-Glu-Ala-His) box polypeptide 15                                         |
|                        | 1,25 | 0,00357 | 10756663 |          |                                                                                   |
|                        | 1,25 | 0,00741 | 10784101 |          |                                                                                   |
|                        | 1,25 | 0,01106 | 10939958 |          |                                                                                   |
|                        | 1,25 | 0,01793 | 10708538 |          |                                                                                   |
| <b>Zinki</b>           | 1,25 | 0,00382 | 10759488 | DQ490055 | Arg3.1/Arc mRNA-binding zinc finger protein                                       |
|                        | 1,25 | 0,00438 | 10863469 |          |                                                                                   |
| <b>RGD1306 583</b>     | 1,25 | 0,01256 | 10821134 | BC088172 | similar to RIKEN cDNA 2410002O22 gene                                             |
|                        | 1,25 | 0,00335 | 10746652 |          |                                                                                   |
|                        | 1,25 | 0,00312 | 10920743 |          |                                                                                   |
| <b>Lifr</b>            | 1,25 | 0,01196 | 10821741 | D86345   | leukemia inhibitory factor receptor alpha                                         |
| <b>Arap2</b>           | 1,25 | 0,02860 | 10772863 |          | ArfGAP with RhoGAP domain, ankyrin repeat and PH domain 2                         |
| <b>RGD1560 584</b>     | 1,25 | 0,02105 | 10855948 |          | similar to High mobility group protein 1 (HMG-1)                                  |
| <b>Nck1</b>            | 1,25 | 0,01647 | 10919548 | BC167009 | NCK adaptor protein 1                                                             |
|                        | 1,25 | 0,00300 | 10719074 |          |                                                                                   |
| <b>Spes3</b>           | 1,25 | 0,03631 | 10788053 |          | signal peptidase complex subunit 3 homolog (S. cerevisiae)                        |
| <b>RGD1560 191</b>     | 1,25 | 0,00454 | 10733067 |          | similar to Zinc finger protein 62 homolog (Zfp-62) (ZT3)                          |
| <b>Zinki</b>           | 1,25 | 0,00344 | 10759846 | DQ490055 | Arg3.1/Arc mRNA-binding zinc finger protein                                       |
| <b>Nudcd1</b>          | 1,25 | 0,00293 | 10903562 | BC169014 | NudC domain containing 1                                                          |
| <b>Mettl9 M ettl9b</b> | 1,25 | 0,02188 | 10916804 |          | methyltransferase like 9   methyltransferase like 9b                              |
| <b>Smek1</b>           | 1,25 | 0,01022 | 10891719 |          | SMEK homolog 1, suppressor of mek1 (Dictyostelium)                                |
| <b>Rpa3</b>            | 1,25 | 0,01189 | 10762981 |          | replication protein A3                                                            |
| <b>Inpp5f</b>          | 1,25 | 0,02948 | 10711410 |          | inositol polyphosphate-5-phosphatase F                                            |
|                        | 1,25 | 0,01035 | 10773057 |          |                                                                                   |
| <b>Erlec1</b>          | 1,25 | 0,00290 | 10778897 |          | endoplasmic reticulum lectin 1                                                    |
| <b>Cited2</b>          | 1,25 | 0,00264 | 10701846 | BC087005 | Cbp/p300-interacting transactivator, with Glu/Asp-rich carboxy-terminal domain, 2 |
|                        | 1,25 | 0,03162 | 10791602 |          |                                                                                   |
| <b>Hat1</b>            | 1,25 | 0,02530 | 10836815 | BC087663 | histone acetyltransferase 1                                                       |
|                        | 1,25 | 0,00918 | 10832081 |          |                                                                                   |
|                        | 1,25 | 0,00094 | 10869047 |          |                                                                                   |
|                        | 1,25 | 0,00438 | 10890017 |          |                                                                                   |
| <b>Fam134b</b>         | 1,25 | 0,02149 | 10813949 |          | family with sequence similarity 134, member B                                     |
| <b>Crls1</b>           | 1,25 | 0,02571 | 10840131 | BC085849 | cardiolipin synthase 1                                                            |
| <b>LOC6880 19</b>      | 1,25 | 0,01794 | 10902409 |          | similar to THAP domain containing, apoptosis associated protein 2                 |

**Table S3.** Primers for gene expression analysis by quantitative real-time PCR (qRT-PCR).**qPCR PRIMERS**

| Gene               | Forward primer (5'-3') | Reverse primer (5'-3')  | Product size (bp) |
|--------------------|------------------------|-------------------------|-------------------|
| <i>Hprt</i>        | TTGTTGTTGGATATGCCCTTGA | GGCTTTTCCACTTTCGCTGAT   | 83                |
| <i>Gusb</i>        | CATCGGAGAGCTCATCTGGAA  | CTGCCATCTTGGGGTTTCTCT   | 113               |
| <i>Tbp (Taf9l)</i> | AAGATTTGCCGTGCAGATTCC  | TGAGGAAACCATGTTGGTGGT   | 142               |
| <i>Calb2</i>       | CGCCCTCCTGAAGGATCTGTA  | GGCTCACTGCAAAGCACAATC   | 144               |
| <i>Chrm2</i>       | TCTCCAAGTCTGGTGCAAGGA  | GAGCCTTGCCATTCTGGATCT   | 103               |
| <i>Chrna3</i>      | GCCGAAAACATGAAAGCACAG  | CCGTTCTTAAAATGCACACCA   | 121               |
| <i>Crabp1</i>      | GGATGGCCCCAAAACCTACTG  | CTTGTGCACACCACATCATCG   | 87                |
| <i>Dpp4</i>        | CCCAACTCCAGAGGACAACCT  | GGGCTTTGGAGATCTGAGCTG   | 149               |
| <i>Esr1</i>        | CTTCTGGAGTGTGCCTGGTTG  | CAAAGATCTCCACCATGCCTTC  | 145               |
| <i>Gal</i>         | GAACAGCGCTGGCTACCTTCT  | AACTCCCTCTTGCTGTGAGG    | 90                |
| <i>Galr1</i>       | CTGCCCTTACTGCTCATCTGCT | GCCAAATACCACAACGACCAC   | 141               |
| <i>Htr3a</i>       | CCTCCAAGCCAACAAGACTG   | TTGGTGGTGGAAGAGGGCTAT   | 120               |
| <i>Isl1</i>        | TCAGCCTGCTTTTCAGCAACT  | GGACTGGCTACCATGCTGTTG   | 126               |
| <i>Mst4</i>        | AGAACAATGCAAGCCGAAACC  | AGGGGATTCATCCGCAGAAC    | 143               |
| <i>Nampt</i>       | AGGGACCTTTGTACCCCTTGA  | TCCATGTTACAGCTGTGCATTTT | 144               |
| <i>Nmu</i>         | CTGCAGCTCGTTCCTCAACTG  | TTGTTGACCTCTTCCCATTGC   | 127               |
| <i>Nos1</i>        | TTAGCAATGACCGAAGCTGGA  | GAGCAGCCGAGACTCGTTTTT   | 114               |
| <i>Npy</i>         | GATCCAGCCCTGAGACTGTA   | CACCACATGGAAGGGTCTTCA   | 94                |
| <i>Scg2</i>        | ATCGAAGGCTTACCGATTTGG  | CTGGTTTCGCTGGAAGGAAG    | 94                |
| <i>Snap25</i>      | CAGAATCGCCAGATTGACAGG  | CAGCATCTTTGTTGCACGTTG   | 90                |
| <i>Sst</i>         | ACCCAGACTCCGTCAGTTTC   | CAGGGCATCGTTCTCTGTCTG   | 122               |
| <i>Uchl1</i>       | AATGTGGACGGCCACCTCTAC  | TGCAGCAGAGAGTCTCTGAAC   | 86                |

**Table S4.** Summarized parameters of Sequenom primer pairs designed with Sequenom EpiDesigner.**SEQUENOM PRIMERS**

| Gene          | Forward primer (5'-3')     | Reverse primer (5'-3')       | Target length (bp) | Target CpG | CpG Analyzed |
|---------------|----------------------------|------------------------------|--------------------|------------|--------------|
| <i>Gal</i>    | GTTTTGGGGTGGTTTATTTAGTTT   | ACTAATTAATACAAATCCAAATATCTCC | 472                | 34         | 32           |
| <i>Snap25</i> | AGGAAAGGTATAGTTATTAGGAAAA  | AAAACCTTTTACCTTATCTTCTTCAAA  | 484                | 20         | 19           |
| <i>Uchl1</i>  | GAAGGTTTAGTTTTTTGTTTTTAAGG | ACTTTTTCTCAATATTTCAAAAACCC   | 516                | 20         | 19           |
| <i>Crabp1</i> | TTATTAGTTTTAAAATAGGATGTGGG | CACCAACTTACCCAAAACCTTAAA     | 497                | 40         | 34           |
| <i>Npy</i>    | TGTTTTTTAAGTATAGTGTGTTTTT  | CCCAATTAATCCTAACACTCACCA     | 515                | 33         | 32           |
| <i>Dpp4</i>   | TATTTGTTGGAGTGGTTTTATGGTT  | CAATTAATCCCAATATACAATATCC    | 510                | 35         | 32           |
| <i>Mst4</i>   | GTTGGGATTGGGTTTTAGTGAT     | ACCAAACAAACTTTTACAACCTCAA    | 485                | 27         | 24           |
| <i>Isl1</i>   | GGAGGTAGAAAAGGGAGTTTTTAGTT | CAAATAATAACCCCTAAAATTACCAAA  | 581                | 67         | 66           |
| <i>Gata5</i>  | GGGTAGGATTATTGGGTTTTTTTA   | ACAACAAAATTCAAAACTATTCAAA    | 568                | 40         | 37           |

## Supplementary Methods

**Animal treatment.** *p,p'*-DDE was dissolved in ethanol, with the amount of *p,p'*-DDE administered to each animal corrected (St/DDE and HF/DDE) for water intake and animal average weight. In the control groups, St and HF, the same final volume of ethanol (0.01%) was added to the fluid source. The water and chow were supplied ad libitum and every 3-4 days, water and animal pellet food were renewed and the intake assessed. At the end of the 12 weeks of treatment, 4-6 hours fasted animals were anesthetized with a mixture of ketamine (50 mg/kg) and medetomidine (1 mg/kg) and maintained with isoflurane. The body composition of each rat was determined by bioelectrical impedance (Quantum /S bioelectrical impedance analyzer (RJL Systems, Akern SRL, Florence, Italy)), according to the described in the literature <sup>1</sup>. Before perfusion of the vascular compartment with a saline solution (NaCl 0.9%, w/v), blood was drawn from the left ventricle into tubes with or without heparin to obtain plasma and serum, respectively, and fractions were frozen at -80°C until analysis. Organs were dissected, pat dried and weighed before snap freezing in liquid nitrogen and storing at -80°C until further analysis.

**Adipocyte isolation and lipolysis assay.** Tissues with approximately 5 g were dissected and washed. AT was minced in a collagenase buffer at a 1:1 volume ratio (PBS 1X containing 2% fatty acid-free low endotoxin BSA (bovine serum albumin; Sigma-Aldrich, St Louis, MO) and 250 U/mg collagenase A (Roche Diagnostics, Basel, Switzerland)) and incubated at 37°C for 45 min in a water-bath shaker at 80 oscillations/min. Once digestion was complete, the product was filtered with a normal sterile cell strainer, followed by an additional filtration with a 150-µm nylon mesh (Sefar, Heiden, Switzerland) and a centrifugation at 100 x g for 1 min. The layer of floating cells was then washed 3x with 10% (v/v) Krebs-Ringer bicarbonate buffer with HEPES (KRBH) at 37°C and finally suspended in KRBH for 1 h before the lipolysis assay. To begin basal lipolysis measurements, a total of 800 µL of adipocyte suspension was added to vials with 4 mL of KRBH buffer containing 0.5% fatty acid-free BSA. While stirring, 100 µL of cell suspension was added to each test tube and incubated at 37°C for 90 min with mild agitation. After incubation, the tubes were placed on ice to halt the incubation. Lipolysis was evaluated by measuring the free glycerol using Free Glycerol Reagent (Sigma F6428) and NEFAs quantified using an NEFA-HR(2) assay (Wako

Chemicals GmbH, Neuss, Germany). The lipid content was quantified by Dole extraction to normalize the lipolysis results <sup>2</sup>.

- 1 Smith, D., Jr., Johnson, M. & Nagy, T. Precision and accuracy of bioimpedance spectroscopy for determination of in vivo body composition in rats. *Int J Body Compos Res* **7**, 21-26 (2009).
- 2 Ge, H. *et al.* Activation of G protein-coupled receptor 43 in adipocytes leads to inhibition of lipolysis and suppression of plasma free fatty acids. *Endocrinology* **149**, 4519-4526, doi:10.1210/en.2008-0059 (2008).
